# Supplementary material for: A systematic review of the worldwide prevalence of survivors of poliomyelitis reported in 31 studies
Source: PubMed Central journal article supplement — BMJ Open. 2017 Jul 9;7(7):e015470. doi: 10.1136/bmjopen-2016-015470 (PMC5734404; doi:10.1136/bmjopen-2016-015470), 2017-07-09
Supplement: bmjopen-2016-015470.draft_revisions.pdf [file bmjopen-2016-015470.draft_revisions.pdf]

# BMJ Open

## A systematic review of the worldwide prevalence of polio reported in 31 studies.

|                                 |                                                                                                                                                                                                                                                                                                                                                                                                                                  |
|---------------------------------|----------------------------------------------------------------------------------------------------------------------------------------------------------------------------------------------------------------------------------------------------------------------------------------------------------------------------------------------------------------------------------------------------------------------------------|
| Journal:                        | <i>BMJ Open</i>                                                                                                                                                                                                                                                                                                                                                                                                                  |
| Manuscript ID                   | bmjopen-2016-015470                                                                                                                                                                                                                                                                                                                                                                                                              |
| Article Type:                   | Research                                                                                                                                                                                                                                                                                                                                                                                                                         |
| Date Submitted by the Author:   | 09-Dec-2016                                                                                                                                                                                                                                                                                                                                                                                                                      |
| Complete List of Authors:       | Jones, Kelly; Auckland University of Technology<br>Balalla, Shivanthi; Auckland University of Technology, National Institute for Stroke and Applied Neurosciences<br>Theadom, Alice; Auckland University of Technology, National Institute for Stroke and Applied Neurosciences<br>Jackman, Gordon; Polio NZ Inc.<br>Feigin, Valerie; Auckland University of Technology, National Institute for Stroke and Applied Neurosciences |
| <b>Primary Subject Heading</b>: | Epidemiology                                                                                                                                                                                                                                                                                                                                                                                                                     |
| Secondary Subject Heading:      | Global health                                                                                                                                                                                                                                                                                                                                                                                                                    |
| Keywords:                       | EPIDEMIOLOGY, PUBLIC HEALTH, STATISTICS & RESEARCH METHODS                                                                                                                                                                                                                                                                                                                                                                       |
|                                 |                                                                                                                                                                                                                                                                                                                                                                                                                                  |

SCHOLARONE™  
Manuscripts

Peer Review Only

1  
2  
3 A systematic review of the worldwide prevalence of polio reported in 31 studies.

4 Kelly Jones, Shivanthi Balalla, Alice Theadom, Gordon Jackman and Valery L. Feigin

5  
6  
7  
8  
9 Kelly Jones, PhD, National Institute for Stroke and Applied Neurosciences, Faculty of Health  
10 and Environmental Studies, Auckland University of Technology, AUT North Shore Campus,  
11 AA254, 90 Akoranga Dr, Northcote 0627, Private Bag 92006, Auckland 1142, New Zealand.  
12  
13

14  
15 Telephone: +64 7 838 4257; Email: [kejones@aut.ac.nz](mailto:kejones@aut.ac.nz).

16  
17  
18 Shivanthi Balalla, MPH (Hons), National Institute for Stroke and Applied Neurosciences,  
19 Faculty of Health and Environmental Studies, Auckland University of Technology, AUT  
20 North Shore Campus, AA254, 90 Akoranga Dr, Northcote 0627, Private Bag 92006,  
21  
22 Auckland 1142, New Zealand. Telephone: +64 9 921 9999; Email: [sbalalla@aut.ac.nz](mailto:sbalalla@aut.ac.nz)  
23  
24

25  
26 Alice Theadom, PhD, National Institute for Stroke and Applied Neurosciences, Faculty of  
27 Health and Environmental Studies, Auckland University of Technology, AUT North Shore  
28 Campus, AA254, 90 Akoranga Dr, Northcote 0627, Private Bag 92006, Auckland 1142, New  
29  
30 Zealand. Telephone: +64 9 921 9166; Email: [atheadom@aut.ac.nz](mailto:atheadom@aut.ac.nz)  
31  
32

33  
34 Gordon Jackman, MA, Polio New Zealand Inc., P.O. Box 791 New Plymouth 4340, New  
35  
36 Zealand. Telephone: +64 7 868 5248; Email: [gjackman@clear.net.nz](mailto:gjackman@clear.net.nz)  
37  
38

39  
40 Valery L Feigin, PhD, National Institute for Stroke and Applied Neurosciences, Faculty of  
41 Health and Environmental Studies, Auckland University of Technology, AUT North Shore  
42 Campus, AA254, 90 Akoranga Dr, Northcote 0627, Private Bag 92006, Auckland 1142, New  
43  
44 Zealand. Telephone: +64 9 921 9166; Email: [vfeigin@aut.ac.nz](mailto:vfeigin@aut.ac.nz)  
45  
46  
47  
48  
49

50 **Address correspondence to:** Dr Kelly Marie Jones, PhD, National Institute for Stroke and  
51 Applied Neurosciences, School of Public Health & Psychosocial Studies, Faculty of Health  
52 and Environmental Studies, Auckland University of Technology, AUT North Campus,  
53  
54  
55  
56  
57  
58  
59  
60

1  
2  
3 AA254, 90 Akoranga Dr, Northcote 0627, Private Bag 92006, Auckland 1142, New Zealand.

4  
5 Telephone: +64 9 921 9166; Fax: +64 9 921 9620. Email: kejoness@aut.ac.nz

6  
7 **Total word count:** 2,482

8  
9 **Number of tables:** 2

10  
11 **Number of figures:** 3

12  
13 **Number of references:** 42

14  
15 **Number of supplementary files for online only publication:** 1

16  
17 **Key words:** public health; statistics & research methods; epidemiology.

## ABSTRACT

**Background** Recent accurate prevalence rates estimating the number of polio survivors at any given time are not available. We aim to systematically review literature concerning the prevalence of polio worldwide.

**Methods** Electronic databases were searched up to May 2016 for peer reviewed studies including population-based approach with a defined denominator and some form of diagnostic or clinical verification of polio. Exclusion criteria were any prevalence data were unable to be extracted or calculated and studies reporting on incidence only. The quality of each included study was assessed using an existing tool modified for use in prevalence studies. Average crude prevalence rates were used to calculate worldwide estimates.

**Results** Thirty-one studies met criteria with 90% of studies conducted in low-to-lower middle income countries. Significant variability in the prevalence of polio was revealed, in low-to-lower middle income (15 per 100,000 in Nigeria to 1,733 in India) and upper-middle to high-income countries (24 (Japan) to 380 per 100,000 (Brazil). The total combined prevalence of polio for those studies at low to moderate risk of bias ranged from 165 (high-income countries) to 425 (low-to-lower middle income countries) per 100,000 person years. Lameness surveys of children predominated, with wide variation in case definition and assessment criteria.

**Conclusions** These results highlight the need for future epidemiological studies of polio to examine nationally representative samples, including all ages and more focus on high-income countries. Such efforts will improve capacity to provide reliable and more robust worldwide prevalence estimates.

### Strengths and limitations of this study

- As the battle to eliminate new cases of polio continues, there are no accurate prevalence rates of polio available.
- This is the first study to systematically review studies undertaken examining the worldwide prevalence of polio.
- Results from this review show that studies to date, primarily based on lameness surveys, demonstrate significant variability in the prevalence of polio across low to high income countries. Few studies have examined nationally representative samples thus limiting the reliability of current prevalence estimates.
- While efforts were undertaken to identify and access all relevant article, it is likely that some studies were not identified by the search strategy.
- The estimates provided in this review are likely an underestimation of the prevalence of polio, but findings support the need for future studies examining nationally representative samples that are designed to reduce bias noted in this review.

## INTRODUCTION

Poliomyelitis (polio) is a highly infectious, incurable viral disease that appeared in endemic form in 1900-1950[1], caused by a wild or live vaccine-derived virus. Polio invades the central nervous system[2,3] and sequelae may include permanent physical disability (60-90%), and respiratory, heart and musculoskeletal diseases.[4] Up to 40% of survivors will experience post-polio syndrome, being new or worsening disabling symptoms 30-40 years after the original infection.[5] Efforts to eradicate polio with mass vaccination programs have led to reductions in confirmed cases[1], from an annual rate of approximately 50,000 in 1980 to <1,000 in 2001.[6] Estimates suggest that 12-20 million individuals are living with polio sequelae worldwide.[7] However, recent accurate prevalence rates estimating the number of polio survivors at any given time are not available.[8] Published international prevalence studies are problematic as they have (i) tended to focus on the initial disease and needs in the immediate aftermath, (ii) been inconsistent in the definition of “polio survivor,” with it often unclear whether this refers all those infected or only those sustaining some form of residual disability, (iii) predominantly focused on health status rather than the everyday effects on people’s lives, their needs, and those of their carers, iv) produced inconsistent findings on long-term outcomes, perhaps due to cultural differences, and/or been (vii) limited to lameness surveys of children in mostly low-to-lower middle income countries.[9] Cases of polio may also be missed as those affected may not attend hospital due to quarantine requirements. Worldwide, only 11% of those paralyzed by polio are thought to be captured by national surveillance systems.[10] Hence, regional prevalence estimates are often crude and

1  
2  
3 fragmentary. This systematic literature review aims to synthesise current knowledge on the  
4 prevalence of polio worldwide using all available population-based prevalence studies.  
5  
6  
7

## 8 9 **METHODS**

10 This review is reported according to the PRISMA Statement.

### 11 12 **Search strategy**

13 We searched Medline, CINAHL, Psychology and behavioral sciences, ProQuest, Scopus, and  
14 Web of Science from inception to May 2016 for relevant studies. A search strategy was  
15 developed for Medline using ‘post-polio syndrome’, ‘poliovirus’, ‘polio’, ‘postpolio’,  
16 ‘poliomyelitis’, ‘postpoliomyelitis’, ‘PPMA’, ‘PPMD’, ‘LEOP’, or ‘late effects of polio’ and  
17 ‘epidemiol’, ‘rate’, ‘proportion’, or ‘prevalence\*’, and was then adapted for other database  
18 searches. Hand searching of included articles was also undertaken.  
19  
20  
21  
22  
23  
24  
25  
26  
27

### 28 29 **Inclusion/exclusion criteria**

30 Inclusion criteria were: peer reviewed; written in English; reporting of prevalence of polio;  
31 use of a population-based, epidemiology approach with a defined denominator; and some  
32 form of diagnostic or clinical verification of polio. Only those studies reporting on cases  
33 ascertained from a general population sample (i.e., not restricted by gender or ethnicity) were  
34 included to enable comparison between populations, and with other conditions, and to enhance  
35 representativeness of the findings. Studies in which any prevalence data were unable to be  
36 extracted or calculated, or studies reporting incidence data only were excluded. Duplicate  
37 publications reporting on the same research data were also removed.  
38  
39  
40  
41  
42  
43  
44  
45  
46  
47

### 48 49 **Quality appraisal**

50 Each study was assessed for methodological quality and risk of bias using a 10-item  
51 assessment tool (external (4 items) and internal (6 items) validity) specifically designed for  
52 population-based prevalence studies. Further, a summary assessment evaluates the overall risk  
53  
54  
55  
56  
57  
58  
59  
60

1  
2  
3 of study bias based on the 10 items.[1] A summary assessment deeming a study to be at low  
4 risk of bias suggests that ‘further research is very unlikely to change our confidence in the  
5 estimate’. A moderate risk of bias rating suggests that ‘further research is likely to have an  
6 important impact on our confidence in the estimate and may change the estimate’. The  
7 limitations of studies considered to be at high risk of bias suggest that ‘further research is  
8 very likely to have an important impact on our confidence in the estimate and is likely to  
9 change the estimate’. For this review, a study was considered to have a high risk of bias if the  
10 target population was not closely representative of the national population, if there was no use  
11 of random selection, and if the study had a more than a minimal risk of non-response bias.  
12  
13  
14  
15  
16  
17  
18  
19  
20  
21

### 22 **Data extraction and synthesis**

23  
24 Two authors (KJ, SB) independently reviewed abstracts for possible inclusion. In cases of  
25 non-consensus, a third independent review was obtained from a third author (VF). Any on-  
26 going discrepancies were resolved via discussion. In cases of incomprehensive study  
27 methodology, authors were approached to determine a study's potential inclusion. Where  
28 possible, copies of full articles were obtained for studies meeting the inclusion criteria.  
29 Reviewers extracted standard information per study on study characteristics, target  
30 population, research design, and verification of polio diagnosis. Only those studies  
31 considered to be at low to moderate risk of bias were included in the calculation of  
32 prevalence estimates. An average prevalence of polio is reported for each study as the  
33 number of cases per 100,000 people of all ages or a particular age range, depending on the  
34 data available. Rates were checked for accuracy where possible, depending on the data  
35 provided. Due to a lack of availability of standardized rates, prevalence rates are reported as  
36 crude estimate (i.e. unadjusted rates). Studies reporting adjusted values only have not been  
37 included the average prevalence calculation. In instances where a range of prevalence rates  
38 have been reported in a study and no overall rate reported (e.g. across ethnic groups or  
39  
40  
41  
42  
43  
44  
45  
46  
47  
48  
49  
50  
51  
52  
53  
54  
55  
56  
57  
58  
59  
60



1  
2  
3 different geographical regions or years), we have used the average of this range for the  
4  
5 purposes of calculating an overall average prevalence. The research protocol was not subject  
6  
7 to ethical approval as no such approval was required according to local regulations.  
8  
9

## 10 11 **RESULTS**

### 12 13 **Included studies**

14  
15 An overview of the study selection process is outlined in Figure 1. The initial search yielded  
16  
17 1,239 citations. Following scanning of the titles for appropriateness for inclusion, those not  
18  
19 meeting criteria and duplicate citations were removed (973). Where available, the abstracts of  
20  
21 the remaining 266 potentially relevant titles identified across all sources (EBSCO n = 25;  
22  
23 ProQuest n = 17; Scopus n = 88; Web of Science n = 136) were obtained. Following the  
24  
25 availability and review of 206 abstracts, 117 full articles were independently evaluated for  
26  
27 inclusion by two reviewers (SB, KJ). This process led to the elimination of 86 studies that did  
28  
29 not meet the required inclusion criteria. The remaining 31 articles met inclusion criteria and  
30  
31 were included in the review.  
32  
33

34  
35 [INSERT FIGURE 1 ABOUT HERE]  
36  
37

38  
39 The 31 eligible population-based studies reported data from 14 different countries.  
40  
41 Data on polio prevalence in low-to-lower middle income countries were reported in 28 (90%)  
42  
43 studies in 11 countries: India (14 studies); Nigeria (2 studies); Ethiopia (4 studies), and one  
44  
45 study in each of the following locations: Indonesia, Ghana, Bangladesh, Niger, Cameroon,  
46  
47 Sudan, Yemen, and Papua New Guinea. Population-based data on polio prevalence in upper-  
48  
49 middle to high-income countries were available from 3 studies in 3 countries: Japan; Sweden;  
50  
51 and Brazil.  
52  
53  
54  
55  
56  
57  
58  
59  
60

### Study characteristics

Table 1 provides a summary of the characteristics of those articles included in the review, including details of polio verification, population status, study design, and risk of bias. The included studies reported on polio prevalence data collected between 1974 and 2004. In terms of methodologies implemented across the included studies, diagnosis of polio was verified in 28 (90%) cases via the use of clinical investigations (i.e., examination by a physician or similar). Two of these studies also used laboratory investigations (i.e., virological confirmation) to confirm a history of polio. Twenty-nine (94%) of studies presented data collected by lameness surveys. These included surveys of schools (5), villages (1), families (1), house-to-house surveys (16), or a mixture there of (4), and postal questionnaires (1). One lameness survey examined a national population. The remaining two studies (6%) used multiple sources of case ascertainment. Studies most commonly examined urban/rural or semi-rural populations (12), with 8 eight studies limited to rural populations. Only one study reported a specific focus on an urban population. Of the 31 studies included, 26 (84%) presented data based on children and young persons aged <20 years. In terms of risk of bias, the majority of studies (77%) were at moderate (14 studies, 45%) to high (10 studies, 32%) risk of bias (Figure 2). Seven studies (23%) were considered to be at low risk of bias.

[INSERT TABLE 1 ABOUT HERE]

[INSERT FIGURE 2 ABOUT HERE]

### Polio prevalence

In the general population, crude average prevalence in across all included studies ranged from 15 per 100,000 in Nigeria to 1,733 in Ajmer City, India (Figure 3). Among all low-to-lower middle income countries, crude rates of polio prevalence ranged from 15 per 100,000 (Igbo-

1  
2  
3 Ora, Nigeria) to 1,733 per 100,000 (Ajmer City, Rajasthan, India). Among all high-income  
4  
5 counties, crude rates of polio prevalence ranged from 24 (PPS) per 100,000 (Japan) to 380  
6  
7 per 100,000 (Brazil). For those studies considered to be at low to moderate risk of bias,  
8  
9 prevalence estimates ranged from 92 in Sweden to 730 in Ethiopia. The total combined  
10  
11 prevalence of polio for those studies at low to moderate risk of bias ranged from 165 (high-  
12  
13 income countries) to 425 (low-to-lower middle income countries) per 100,000 person years.  
14  
15

16  
17 [INSERT FIGURE 3 ABOUT HERE]  
18  
19

## 20 21 **DISCUSSION**

22  
23 This study reviews all the available data from population-based polio prevalence studies.  
24  
25 Findings reveal significant discrepancies in average crude unadjusted prevalence rates, both  
26  
27 between and within countries. Across all included studies and within low-to-lower middle  
28  
29 income countries, prevalence rates ranged from 15 per 100,000 person-years in Igbo-Ora  
30  
31 Nigeria to 1,733 in Ajmer City, India. Within high income countries, rates ranged from 24 in  
32  
33 Japan to 380 in Brazil. Variations in prevalence between studies could be due to  
34  
35 methodological variations and shortcomings.  
36  
37

38  
39 Prevalence studies to date have predominantly used lameness surveys and varying  
40  
41 clinical examinations or definitions to confirm a history of polio. Both of these approaches  
42  
43 are problematic. Lameness surveys are limited in that they only capture those individuals  
44  
45 with residual physical disabilities. Cases of people living with the effects of polio may be  
46  
47 missed in the absence of any physical abnormality. There has also been a predominant focus  
48  
49 on surveys of children living with the physical consequences of polio. Findings from such  
50  
51 surveys are further limited by the considerable variation in the range of age groups that have  
52  
53 been surveyed (i.e., 5-15 years, 0-6 months). Lameness surveys limited to the study of  
54  
55 children with physical ailments are likely to represent an underestimate of the true prevalence  
56  
57  
58  
59  
60

1  
2  
3 of those living post-polio. Few studies examined the prevalence of polio across all age  
4  
5 groups, nor have samples that are representative of the respective national population been  
6  
7 studied to inform appropriate gender, age and ethnicity estimates.  
8

9  
10 Worldwide variations in prevalence ratings could also be attributed to the diversity  
11  
12 (and at times a lack of clarity) of applied case definitions and assessment processes to  
13  
14 determine a history of polio. For example, while the majority of studies used lameness  
15  
16 surveys, some studies were limited to the examination of lower extremity disabilities. Other  
17  
18 studies included the examination of upper extremity disabilities in their efforts to identify  
19  
20 those affected by polio. Three studies were limited to the examination of post-polio  
21  
22 syndrome. Such inconsistencies are of concern given incomplete case ascertainment or  
23  
24 disease misclassification can significantly skew the reported prevalence. Even assuming that  
25  
26 all cases were ascertained in a given study, data would still omit those survivors of polio who  
27  
28 are free from any observable, physical ailments. The estimates provided should be considered  
29  
30 to be an underestimation of the prevalence of polio worldwide. Our findings suggest the  
31  
32 average crude worldwide prevalence of 295/100,000 person years. However, given estimates  
33  
34 that 10 to 40% of polio survivors are free from permanent physical disability[4], it is worth  
35  
36 noting that the actual worldwide prevalence may be higher given the predominant focus to  
37  
38 date on children and lame populations.  
39  
40

41  
42 Furthermore, the majority of research to date has been conducted within low-to-lower  
43  
44 middle income countries. Few studies have examined the prevalence of polio survivors in  
45  
46 high income countries, including those declared to be polio-free. For example, no prevalence  
47  
48 population-based studies were found based on data from Australasia, United Kingdom, or the  
49  
50 United States of America. Hence, there is currently little suitable evidence available to inform  
51  
52 the calculation of prevalence estimates for polio in high income countries.  
53  
54  
55  
56  
57  
58  
59  
60

1  
2  
3 This review has provided an overview of the worldwide prevalence of polio informed  
4 by population-based studies to date. While all efforts were undertaken to identify and access  
5 all articles relevant to the review, it is important to acknowledge the likelihood that some  
6 studies (i.e., unpublished or inaccessible studies) were not identified by the search strategy  
7 and therefore excluded. Alongside methodological concerns already discussed above, the  
8 international prevalence estimates from this review should be considered to be a likely  
9 underestimate of the true prevalence on an international scale. Well-designed epidemiological  
10 studies are now required to more accurately determine the prevalence of polio.  
11  
12  
13  
14  
15  
16  
17  
18  
19

20 Future epidemiological polio studies must be designed to reduce bias noted in this  
21 review, including the use of random or cluster sampling, the examination of populations that  
22 are representative of the national population where possible, and the application of clear case  
23 definitions and diagnosis. In addition to recommending that future studies to adhere to the  
24 Strengthening the Reporting of Observational Studies in Epidemiology (STROBE)  
25 Statement[42], we offer specific recommendations for the pursuit of future studies examining  
26 prevalence of polio in Table 2.  
27  
28  
29  
30  
31  
32  
33  
34

35 [INSERT TABLE 2 ABOUT HERE]  
36  
37  
38  
39  
40  
41  
42  
43  
44  
45  
46  
47  
48  
49  
50  
51  
52  
53  
54  
55  
56  
57  
58  
59  
60

Table 2. Suggested recommendations for future epidemiological studies of polio.

---

**External validity**

Examine nationally representative populations to enhance the generalizability of findings

Further prevalence studies are required in high-income countries

Examine all age groups (i.e., adults and children)

Estimate prevalence by age, sex, residency (urban/rural) and ethnic-specific rates

Undertake a census OR use some form of random selection (i.e., cluster sampling)

Extending findings of lameness surveys by also capturing lame-free cases of polio (i.e., using multiple sources of case ascertainment including review of medical records)

Use an established risk of bias tool specifically designed for use in population-based studies

---

**Internal validity**

Standard case definition and clinical evaluation

Describe any efforts to address potential sources of bias

Appropriate numerator (s) and denominator (s)

---

**Conclusions**

In conclusion, the review reported prevalence of polio worldwide from all identified studies.

The majority of research to date has been limited to the examination of children and adolescents in low to lower middle income countries (predominantly India) who reside in geographical regions that are not representative of the national population (in terms of age,

sex, ethnic distributions, for example). Further research of polio prevalence is required using a population-based approach, examining nationally representative samples of all ages, particularly in high income countries, including those declared to be polio-free. Such efforts will reduce risks for sampling and measurement bias and improve capacity to provide reliable and more robust worldwide prevalence estimates.

**Competing Interests** None declared.

**Disclosure of conflict of interest** There are no conflicts of interest.

**Funding** This work was funded by The Sir Thomas and Lady Duncan Trust Fund.

### Legends

Figure 1. Flow diagram of included/excluded studies.

Figure 2. Risk of bias summary of included population-based studies in reverse chronological order.

Figure 3. Polio prevalence by country income level.

#### *What is already known on this subject?*

The World Health Assembly commitment to the worldwide eradication of polio has achieved great success in the Americas, Europe and the Western Pacific. Yet, elimination of new polio cases is not complete. While estimates suggest that up to 20 million people live with the disabling consequences of polio, no accurate prevalence rates are available.

#### *What this study adds?*

This is the first study to systematically review studies examining the worldwide prevalence of polio. Our findings show that studies to date, primarily based on lameness surveys, demonstrate significant variability in the prevalence of polio across low to high income

1  
2  
3 countries. Few studies have examined nationally representative samples thus limiting the  
4  
5 reliability of current worldwide prevalence estimates.  
6  
7

8  
9  
10 Contributorship statement

11  
12 GJ conceived on the study. SB conducted searches and extracted the data. KJ and SB  
13  
14 compiled and analyzed data. VF, AT and GJ advised throughout the study. KJ prepared the  
15  
16 initial draft of the manuscript. All authors provided conceptual input and critical review of  
17  
18 drafts.  
19  
20

21  
22 Data sharing statement

23  
24  
25 No additional data available.  
26  
27  
28  
29  
30  
31  
32  
33  
34  
35  
36  
37  
38  
39  
40  
41  
42  
43  
44  
45  
46  
47  
48  
49  
50  
51  
52  
53  
54  
55  
56  
57  
58  
59  
60



## REFERENCES

1. Hoy D, Brooks P, Woolf A, et al. Assessing risk of bias in prevalence studies: Modification of an existing tool and evidence of interrater agreement. *J Clin Epidemiol* 2012;**65**(934-939)
2. Nathanson N. The pathogenesis of poliomyelitis: what we don't know. *Adv Virus Res* 2008;**71**:1-50
3. Knipe D, Peter M. Enteroviruses: Polioviruses, coxsackieviruses, echoviruses, and newer enteroviruses. In: Fields BN, ed. *Fields Virology*. Philadelphia, PA: Wolters Kluwer, 2007:841-93.
4. Kang J-H, Li H-C. Comorbidity profile of poliomyelitis survivors in a Chinese population: a population-based study. *J Neurol Neurophysiol* 2011;**258**(6):1026-33
5. Lin KH, Lim YW. Post-poliomyelitis syndrome: case report and review of the literature. *Ann Acad Med Singapore* 2005;**34**(7):447-49
6. World Health Assembly. *Polio Eradication by the Year 2000*. Geneva, Switzerland: World Health Organization, 1988.
7. Gonzalez H, Olsson T, Borg K. Management of postpolio syndrome. *Lancet Neurol* 2010;**9**(6):634 e42
8. Grocea NE, Banks LM, Steine MA. Surviving polio in a post-polio world. *Soc Sci Med* 2014;**107**:171-78 doi: 10.1016/j.socscimed.2014.02.024[published Online First: 14 February 2014]].
9. Jones K, Theadom A, Ballala S, et al. *Prevalence of polio: An international systematic review*. Auckland, New Zealand: Auckland University of Technology, 2016.
10. Ward NA, Milstien JB, Hull HF, et al. The WHO-EPI initiative for the global eradication of poliomyelitis. *Biologicals* 1993;**21**(4):327-33

- 1  
2  
3 11. Takemura J, Saeki S, Hachisuka K, et al. Prevalence of post-polio syndrome based on a  
4  
5 cross-sectional survey in Kitakyushu, Japan. *J Rehabil Med* 2004;**36**(1):1-3  
6
- 7 12. Tessema T, Hailu A. Epidemiology of poliomyelitis in northwestern Ethiopia. *East Afr*  
8  
9 *Med J* 2001;**78**(8):430-2  
10
- 11 13. Anand K, Kant S, Kumar G, et al. Thirty year trend (1967-1996) in prevalence of  
12  
13 poliomyelitis and vaccine coverage in Ballabgarh, Haryana, India. *J Epidemiol*  
14  
15 *Community Health* 1998;**52**(12):823-25  
16
- 17 14. Srinivasa DK, Sahai A, Rotti SB, et al. Poliomyelitis trends in Pondicherry, South India,  
18  
19 1989-91. *J Epidemiol Community Health* 1997;**51**(4):443-8  
20
- 21 15. Ahlström G, Gunnarsson LG, Leissner P, et al. Epidemiology of Neuromuscular  
22  
23 Diseases, Including the Postpolio Sequelae, in a Swedish County. *Neuroepidemiology*  
24  
25 1993;**12**(5):262-69  
26
- 27 16. Soudarssanane MB, Rotti SB, Srinivasa DK, et al. Paralytic poliomyelitis in children  
28  
29 under 6 years in Pondicherry: a community survey. *J Epidemiol Community Health*  
30  
31 1993;**47**(3):210-14 doi: 10.1136/jech.47.3.210.  
32
- 33 17. Kumar R, Kumar V. Poliomyelitis control by annual immunization campaigns with oral  
34  
35 polio-virus vaccine in a rural area of India. *Trop Geogr Med* 1991;**43**(1-2):215-9  
36
- 37 18. Balraj V, John JT, Thomas M, et al. Efficacy of Oral Poliovirus Vaccine in Rural  
38  
39 Communities of North Arcot District, India. *Int J Epidemiol* 1990;**19**(3):711-14 doi:  
40  
41 10.1093/ije/19.3.711.  
42
- 43 19. Mehra M, Bansal Y. Prevalence of paralytic poliomyelitis in a rural and urban community  
44  
45 of Delhi. *Indian Pediatr* 1990;**27**(9):915-7  
46
- 47 20. Parakoyi B, Babaniyi OA. Prevalence of paralytic poliomyelitis in children of Kwara  
48  
49 State, Nigeria: report of a house-to-house survey. *East Afr Med J* 1990;**67**(8):545-9  
50  
51  
52  
53  
54  
55  
56  
57  
58  
59  
60

- 1  
2  
3 21. Tekle-Haimanot R, Abebe M, Gebre-Mariam A, et al. Community-based study of  
4  
5 neurological disorders in rural central Ethiopia. *Neuroepidemiology* 1990;**9**(5):263-77  
6  
7 22. Khajuria R, Datta N, Kumar R, et al. Impact of annual immunisation programme with  
8  
9 oral polio vaccine on the prevalence of paralytic poliomyelitis. *Indian J Pediatr*  
10  
11 1989;**56**(3):343-7  
12  
13 23. Dekker PA, Green-Abate C. Prevalence of residual paralysis due to poliomyelitis in  
14  
15 schoolchildren in Addis Ababa. *Ethiop Med J* 1988;**26**(3):133-8  
16  
17 24. Maru M, Getahun A, Hoshna S. Prevalence of paralytic poliomyelitis in rural and urban  
18  
19 populations in Ethiopia: report of a house-to-house survey. *Am J Trop Med Hyg*  
20  
21 1988;**38**(3):633-5  
22  
23 25. Osuntokun BO, Adeuja AOG, Schoenberg BS, et al. Neurological disorders in Nigerian  
24  
25 Africans: A community-based study. *Acta Neurol (Napoli)* 1987;**75**(1):13-21  
26  
27 26. Tidke RW, Joshi U, Patel RB. Paralytic poliomyelitis in slums of Bombay. *Indian J*  
28  
29 *Pediatr* 1986;**53**(1):109-13 doi: 10.1007/bf02787081.  
30  
31 27. Broca JS, Chaturvedi SK, Mathur GM. Prevalence of residual polio paralysis in children  
32  
33 of 5-15 years age group in Ajmer City. *Indian J Public Health* 1985;**29**(3):193-200  
34  
35 28. Basu Rf, Sokhey J. Prevalence of poliomyelitis in India. *Indian J Pediatr* 1984;**51**(5):515-  
36  
37 19 doi: 10.1007/bf02776613.  
38  
39 29. Heymann DL, Floyd VD, Lichnevski M, et al. Estimation of incidence of poliomyelitis  
40  
41 by three survey methods in different regions of the United Republic of Cameroon.  
42  
43 *Bull World Health Organ* 1983;**61**(3):501-07  
44  
45 30. Olive JM, Gadir A, Abbas M. Prevalence of residual paralysis from paralytic  
46  
47 poliomyelitis in some urban and semi-rural areas of the Sudan, November 1982. *J*  
48  
49 *Trop Pediatr* 1984;**30**(6):329-33  
50  
51  
52  
53  
54  
55  
56  
57  
58  
59  
60

- 1  
2  
3 31. Srilatha V, Mukarji D, John TJ. The Prevalence of Poliomyelitis in Rural School Children  
4  
5 in South India. *J Trop Pediatr* 1984;**30**(2):68-69 doi: 10.1093/tropej/30.2.68.  
6  
7 32. Hajar M, Zeid A, Saif M, et al. Prevalence, incidence, and epidemiological features of  
8  
9 poliomyelitis in the Yemen Arab Republic. *Bull World Health Organ* 1983;**61**(2):353  
10  
11 33. Sabin AB, Silva E. Residual paralytic poliomyelitis in a tropical region of Brazil, 1969–  
12  
13 1977: prevalence surveys in different age groups as indicators of changing incidence.  
14  
15 *Am J Epidemiol* 1983;**117**(2):193-200  
16  
17 34. Hall AJ. A survey of lameness in school children in Gulf Province. *P N G Med J*  
18  
19 1982;**25**(1):26-8  
20  
21 35. Rotti SB, Satpathy SK, Mehta SP. Prevalence of paralytic poliomyelitis in Pondicherry,  
22  
23 South India. *J Epidemiol Community Health* 1982;**36**(4):279-81 doi:  
24  
25 10.1136/jech.36.4.279.  
26  
27 36. Thuriaux MC. A prevalence survey of lower limb motor disorders in school-age children  
28  
29 in Niger and an estimation of poliomyelitis incidence. *Trop Geogr Med*  
30  
31 1982;**34**(2):163-8  
32  
33 37. Snyder JD, Black RE, Baqui AH, et al. Prevalence of residual paralysis from paralytic  
34  
35 poliomyelitis in a rural population of Bangladesh. *Am J Trop Med Hyg*  
36  
37 1981;**30**(2):426-30  
38  
39 40. Ulfah NM, Parastho S, Sadjimin T, et al. Polio and Lameness in Yogyakarta, Indonesia.  
40  
41  
42 *Int J Epidemiol* 1981;**10**(2):171-75 doi: 10.1093/ije/10.2.171|.  
43  
44 45 39. Jhala CI, Goel RK, Dave SK. Epidemiology of poliomyelitis in rural area of Gujarat -- a  
46  
47 report of house to house survey in Patan Taluka. *Indian J Med Sci* 1979;**33**(6):143-9  
48  
49 50 40. Nicholas DD, Kratzer JH, Ofosu-Amaah S, et al. Outside Europe. Is poliomyelitis a  
51  
52 serious problem in developing countries?--the Danfa experience. *BMJ*  
53  
54  
55  
56  
57  
58  
59  
60

1  
2  
3 1977;1(6067):1009-12 doi: 10.1136/bmj.1.6067.1009[published Online First: 16  
4  
5 April 1977]].

6  
7 41. Hardas U, Waikar A. Pilot survey of disabled children in and around Nagpur. *Indian J*  
8  
9 *Pediatr* 1974;**41**(8):267-71 doi: 10.1007/bf02829306.

10  
11 42. von Elm E, Altman DG, Egger M, et al. The Strengthening the Reporting of  
12  
13 Observational Studies in Epidemiology (STROBE) Statement: Guidelines for  
14  
15 Reporting Observational Studies. *Ann Intern Med* 2007;**147**(8):573-77 doi:  
16  
17 <http://dx.doi.org/10.7326/0003-4819-147-8-200710160-00010-w1>.  
18  
19  
20  
21  
22  
23  
24  
25  
26  
27  
28  
29  
30  
31  
32  
33  
34  
35  
36  
37  
38  
39  
40  
41  
42  
43  
44  
45  
46  
47  
48  
49  
50  
51  
52  
53  
54  
55  
56  
57  
58  
59  
60

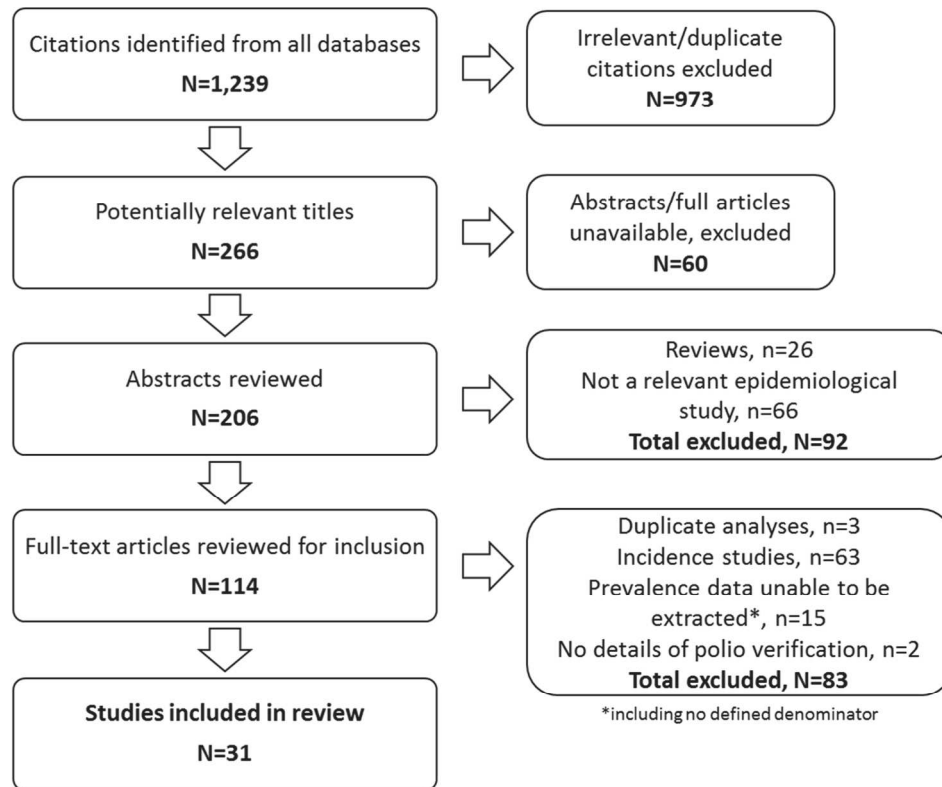

Figure 1. Flow diagram of included/excluded studies.

183x161mm (300 x 300 DPI)

|                     | Target population close representation of national | Sampling frame true representation of target population | Random selection used | Minimal risk of non-response bias | Data collected from subjects (not a proxy) | Acceptable case definition | Reliable and validity measurement of parameter of | Consistent mode of data collection | Appropriate prevalence period | Appropriate numerators and denominators | Overall risk |
|---------------------|----------------------------------------------------|---------------------------------------------------------|-----------------------|-----------------------------------|--------------------------------------------|----------------------------|---------------------------------------------------|------------------------------------|-------------------------------|-----------------------------------------|--------------|
| Takemura 2004       | X                                                  | ✓                                                       | ✓                     | X                                 | ✓                                          | ✓                          | X                                                 | ✓                                  | ✓                             | ✓                                       | Moderate     |
| Tessema 2001        | X                                                  | ✓                                                       | ✓                     | X                                 | ✓                                          | ✓                          | ✓                                                 | ✓                                  | ✓                             | ✓                                       | Low          |
| Anand 1998          | X                                                  | X                                                       | X                     | X                                 | ✓                                          | ✓                          | ✓                                                 | ✓                                  | ✓                             | ✓                                       | High         |
| Srinivasa 1997      | X                                                  | ✓                                                       | X                     | X                                 | ✓                                          | ✓                          | ✓                                                 | ✓                                  | ✓                             | ✓                                       | Moderate     |
| Ahlstrom 1993       | ✓                                                  | ✓                                                       | ✓                     | X                                 | X                                          | ✓                          | ✓                                                 | ✓                                  | ✓                             | ✓                                       | Low          |
| Soudarssane 1993    | X                                                  | ✓                                                       | ✓                     | X                                 | ✓                                          | ✓                          | ✓                                                 | ✓                                  | ✓                             | ✓                                       | Low          |
| Kumar 1991          | X                                                  | X                                                       | X                     | X                                 | X                                          | X                          | ✓                                                 | ✓                                  | ✓                             | ✓                                       | High         |
| Balraj 1990         | X                                                  | ✓                                                       | ✓                     | X                                 | ✓                                          | ✓                          | X                                                 | ✓                                  | ✓                             | ✓                                       | Moderate     |
| Mehra 1990          | X                                                  | ✓                                                       | X                     | X                                 | ✓                                          | ✓                          | ✓                                                 | ✓                                  | ✓                             | ✓                                       | Moderate     |
| Parakoyi 1990       | X                                                  | ✓                                                       | ✓                     | X                                 | ✓                                          | ✓                          | ✓                                                 | ✓                                  | ✓                             | ✓                                       | Low          |
| Tekle-Haimanot 1990 | X                                                  | ✓                                                       | ✓                     | ✓                                 | ✓                                          | X                          | X                                                 | ✓                                  | ✓                             | ✓                                       | Moderate     |
| Khajuria 1989       | X                                                  | X                                                       | X                     | X                                 | X                                          | ✓                          | X                                                 | X                                  | ✓                             | ✓                                       | High         |
| Maru 1988           | X                                                  | ✓                                                       | ✓                     | X                                 | ✓                                          | ✓                          | ✓                                                 | ✓                                  | ✓                             | ✓                                       | Low          |
| Osuntokun 1987      | X                                                  | ✓                                                       | ✓                     | X                                 | ✓                                          | X                          | X                                                 | ✓                                  | ✓                             | ✓                                       | Moderate     |
| Tidke 1986          | X                                                  | X                                                       | X                     | X                                 | ✓                                          | ✓                          | ✓                                                 | ✓                                  | ✓                             | ✓                                       | High         |
| Broca 1985          | X                                                  | ✓                                                       | ✓                     | X                                 | ✓                                          | ✓                          | X                                                 | ✓                                  | ✓                             | ✓                                       | Moderate     |
| Basu 1984           | ✓                                                  | ✓                                                       | ✓                     | X                                 | ✓                                          | X                          | ✓                                                 | ✓                                  | ✓                             | ✓                                       | Low          |
| Olive 1984          | X                                                  | ✓                                                       | ✓                     | X                                 | ✓                                          | X                          | ✓                                                 | ✓                                  | ✓                             | ✓                                       | Moderate     |
| Srilatha 1984       | X                                                  | ✓                                                       | X                     | X                                 | ✓                                          | X                          | ✓                                                 | ✓                                  | ✓                             | ✓                                       | High         |
| Hajar 1983          | ✓                                                  | ✓                                                       | ✓                     | X                                 | ✓                                          | ✓                          | ✓                                                 | ✓                                  | ✓                             | ✓                                       | Low          |
| Heymann 1983        | X                                                  | ✓                                                       | ✓                     | X                                 | ✓                                          | ✓                          | ✓                                                 | X                                  | ✓                             | ✓                                       | Moderate     |
| Sabin 1983          | X                                                  | ✓                                                       | X                     | X                                 | ✓                                          | ✓                          | ✓                                                 | ✓                                  | ✓                             | ✓                                       | Moderate     |
| Dekker 1982         | X                                                  | X                                                       | X                     | X                                 | ✓                                          | X                          | X                                                 | ✓                                  | ✓                             | ✓                                       | High         |
| Hall 1982           | X                                                  | ✓                                                       | X                     | X                                 | X                                          | ✓                          | X                                                 | X                                  | ✓                             | ✓                                       | High         |
| Rotti 1982          | X                                                  | ✓                                                       | X                     | X                                 | ✓                                          | ✓                          | ✓                                                 | ✓                                  | ✓                             | ✓                                       | Moderate     |
| Thuriaux 1982       | X                                                  | ✓                                                       | ✓                     | X                                 | ✓                                          | ✓                          | X                                                 | ✓                                  | ✓                             | ✓                                       | Moderate     |
| Snyder 1981         | X                                                  | ✓                                                       | X                     | X                                 | ✓                                          | ✓                          | ✓                                                 | ✓                                  | ✓                             | ✓                                       | Moderate     |
| Ulfah 1981          | X                                                  | X                                                       | X                     | X                                 | ✓                                          | ✓                          | ✓                                                 | X                                  | ✓                             | ✓                                       | High         |
| Nicholas 1977       | X                                                  | X                                                       | X                     | X                                 | X                                          | ✓                          | ✓                                                 | X                                  | ✓                             | ✓                                       | High         |
| Hardas 1974         | X                                                  | ✓                                                       | ✓                     | X                                 | ✓                                          | X                          | ✓                                                 | ✓                                  | ✓                             | ✓                                       | Moderate     |
| Jhala 1973          | X                                                  | X                                                       | X                     | X                                 | ✓                                          | ✓                          | ✓                                                 | ✓                                  | ✓                             | ✓                                       | High         |

Figure 2. Risk of bias summary of included population-based studies in reverse chronological order.

168x233mm (300 x 300 DPI)

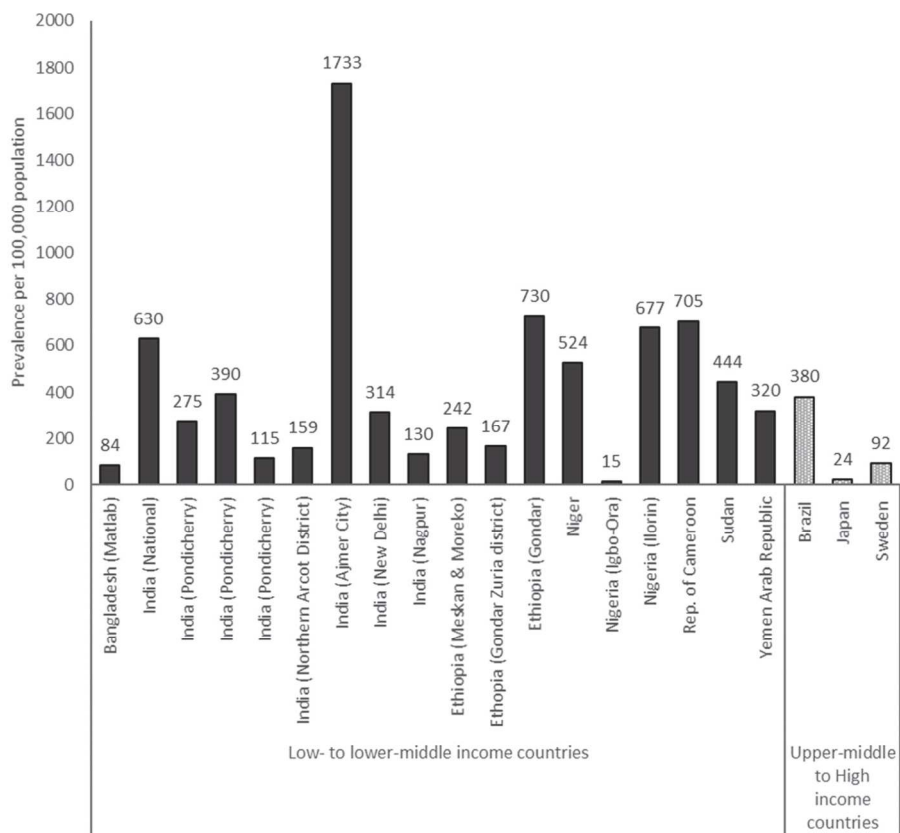

Figure 3. Polio prevalence by country income level

168x162mm (300 x 300 DPI)

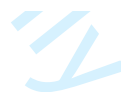



Table 1. Details of included population-based studies in reverse chronological order.

| First Author    | Year | Country (Region)                  | Population status                              | Population base                         | Study design / Date                                                                            | Full article | Verification of diagnosis             | Risk rating |
|-----------------|------|-----------------------------------|------------------------------------------------|-----------------------------------------|------------------------------------------------------------------------------------------------|--------------|---------------------------------------|-------------|
| Takemura(11)    | 2004 | Japan (Kitakyushu)                | Registry of 13,000 physically disabled persons | 342                                     | Lameness survey (postal questionnaire)                                                         | Yes          | Clinical investigation                | Moderate    |
| Tessema(12)     | 2001 | Ethiopia* (Gondar Zuria district) | General population (urban/rural)               | 12,000 children aged 1-15 years         | Lameness survey (house-to-house) Jul-Aug 1993                                                  | Yes          | Clinical investigation                | Low         |
| Anand(13)       | 1998 | India* (Ballabgarh, Haryana)      | General population (rural)                     | 28,464 children aged <15 years          | Lameness survey (house-to-house) Dec 1996                                                      | Yes          | Clinical and laboratory investigation | High        |
| Srinivasa(14)   | 1997 | India* (Pondicherry)              | General population (urban/rural)               | Approx. 11,000 children aged <60 months | Lameness survey (house-to-house) Jan-Feb of each year between 1989-91                          | Yes          | Clinical investigation                | Moderate    |
| Ahlstrom(15)    | 1993 | Sweden (Orebro)                   | General population (urban/rural)               | 269,341                                 | Multiple sources (hospital, outpatient, institutional, insurance, medical records) 01 Jan 1988 | Yes          | Search of clinical records            | Low         |
| Soudarssane(16) | 1993 | India* (Pondicherry)              | General population                             | 47,960 children aged 0-6 years          | Lameness survey (house-to-house) Apr-Jul 1989                                                  | Yes          | Clinical investigation                | Low         |
| Kumar(17)       | 1991 | India* (Ambala, Haryana State)    | General population                             | 15,761 children aged <15 years          | Lameness survey (house-to-house) Jan 1989                                                      | Yes          | Clinical investigation                | High        |
| Balraj(18)      | 1990 | India* (Northern)                 | General population                             | 42,045 children aged <5 years           | Lameness survey (house-to-house)                                                               | Yes          | Clinical investigation                | Moderate    |

| <b>First Author</b> | <b>Year</b> | <b>Country (Region)</b>                  | <b>Population status</b>         | <b>Population base</b>          | <b>Study design / Date</b>                    | <b>Full article</b> | <b>Verification of diagnosis</b> | <b>Risk rating</b> |
|---------------------|-------------|------------------------------------------|----------------------------------|---------------------------------|-----------------------------------------------|---------------------|----------------------------------|--------------------|
|                     |             | Arcot District, Tamil Nadu State)        | (rural)                          |                                 | Feb-Oct 1988                                  |                     |                                  |                    |
| Mehra(19)           | 1990        | India* (New Delhi)                       | General population (urban/rural) | 7,318 children aged 5-15 years  | Lameness survey (house-to-house) Jun-Aug 1986 | Yes                 | Clinical investigation           | Moderate           |
| Parakoyi(20)        | 1990        | Nigeria* (Ilorin, Kwara State)           | General population (urban/rural) | 4,576 children aged 5-9 years   | Lameness survey (house-to-house) March 1988   | Yes                 | Clinical investigation           | Low                |
| Tekle-Haimanot(21)  | 1990        | Ethiopia* (Meskan & Moreko subdistricts) | General population (rural)       | 60,820 adults                   | Lameness survey (house-to-house) 1986-1988    | Yes                 | Clinical investigation           | Moderate           |
| Khajuria(22)        | 1989        | India* (Haryana)                         | General population (rural)       | 37,851 children aged 1-11 years | Lameness survey (village) 1985                | Yes                 | Clinical investigation           | High               |
| Dekker(23)          | 1988        | Ethiopia* (Addis Ababa)                  | General population               | 256,092 children aged <20 years | Lameness survey (school) Unknown date         | Yes                 | Clinical investigation           | High               |
| Maru(24)            | 1988        | Ethiopia* (Gondar)                       | General population (urban/rural) | 17,941 children aged 5-9 years  | Lameness survey (house-to-house) Feb-Jul 1983 | Yes                 | Clinical investigation           | Low                |
| Osuntokun(25)       | 1987        | Nigeria* (Igbo-Ora)                      | General population               | 18,954                          | Lameness survey (house-to-house) Unknown date | Yes                 | Clinical investigation           | Moderate           |
| Tidke(26)           | 1986        | India* (Bombay)                          | General population               | 15,165 children aged <6 years   | Lameness survey (house-to-house)              | Yes                 | Clinical investigation           | High               |

| First Author | Year | Country (Region)                                | Population status                       | Population base                          | Study design / Date                                                                           | Full article | Verification of diagnosis | Risk rating |
|--------------|------|-------------------------------------------------|-----------------------------------------|------------------------------------------|-----------------------------------------------------------------------------------------------|--------------|---------------------------|-------------|
|              |      |                                                 | (slums)                                 |                                          | Unknown date                                                                                  |              |                           |             |
| Broca(27)    | 1985 | India* (Ajmer City, Rajasthan)                  | General population                      | 6,000 children aged 5-15 years           | Lameness survey (house-to-house) Aug 1981-Mar 1982                                            | Yes          | Clinical investigation    | Moderate    |
| Basu(28)     | 1984 | India (National)*                               | General population (urban / rural)      | 715,039 children aged 5-9 years          | Lameness survey (national) 1981-1982                                                          | Yes          | Clinical investigation    | Low         |
| Heymann(29)  | 1983 | Rep. of Cameroon* (Yaounde, Bamenda, Eseka)     | General population (urban/rural)        | 37,130 children aged 5-11 years          | Multiple sources (hospital and clinical registers, house-to-house and school lameness survey) | Yes          | Clinical investigation    | Moderate    |
| Olive(30)    | 1984 | Sudan* (Port Sudan and Juba, Khartoum)          | General population (urban / semi-rural) | 45,499 children aged 5-13 years          | Lameness survey (house-to-house / school) July-Sept 1982                                      | Yes          | Clinical investigation    | Moderate    |
| Srilatha(31) | 1984 | South India* (North Arcot District, Tamil Nadu) | General population (rural)              | 14,643 children aged 5-17 years          | Lameness survey (school) June-Dec 1979                                                        | Yes          | Unknown                   | High        |
| Hajar(32)    | 1983 | Yemen Arab Republic*                            | General population (urban / rural)      | 12,443 children aged 5-13 years          | Lameness survey (school and community) Nov 1980 – Jan 1981                                    | Yes          | Clinical investigation    | Low         |
| Sabin(33)    | 1983 | Brazil (Federal District of Brazil)             | General population                      | 20,807 children aged 6-7 and 10-11 years | Lameness survey (school) 1980                                                                 | Yes          | Clinical investigation    | Moderate    |

| <b>First Author</b>                                                        | <b>Year</b> | <b>Country (Region)</b>                     | <b>Population status</b>         | <b>Population base</b>                         | <b>Study design / Date</b>                                      | <b>Full article</b> | <b>Verification of diagnosis</b>      | <b>Risk rating</b> |
|----------------------------------------------------------------------------|-------------|---------------------------------------------|----------------------------------|------------------------------------------------|-----------------------------------------------------------------|---------------------|---------------------------------------|--------------------|
| Hall(34)                                                                   | 1982        | Papua New Guinea* (Gulf Province)           | General population               | 3,368 children (ages unspecified)              | Lameness survey (school) 1979                                   | Yes                 | Unknown                               | High               |
| Rotti(35)                                                                  | 1982        | South India* (Pondicherry)                  | General population (urban)       | 6,683 children aged 6-15 years                 | Lameness survey (house-to-house and school) July 1980-Sept 1981 | Yes                 | Clinical investigation                | Moderate           |
| Thuriaux(36)                                                               | 1982        | Niger* (Niamey, Kollo, Tillaberry, Gotheye) | General population (rural/urban) | 46,772 children aged 5-14 years                | Lower limb motor disorders survey (school) Feb-May 1981         | Yes                 | Clinical investigation                | Moderate           |
| Snyder(37)                                                                 | 1981        | Bangladesh* (Matlab)                        | General population (rural)       | 25,000 children aged 5-14 years                | Lameness survey (house-to-house) May-Jun 1979                   | Yes                 | Clinical investigation                | Moderate           |
| Ulfah(38)                                                                  | 1981        | Indonesia* (Yogyakarta)                     | Philanthropic private agency     | 94,376 children and adolescents aged <20 years | Lameness survey (families)                                      | Yes                 | Clinical and laboratory investigation | High               |
| Jhala(39)                                                                  | 1979        | India* (Patan Taluka, Gujarat)              | General population (rural)       | 57,435 adults                                  | Lameness survey (house-to-house)                                | Yes                 | Clinical investigation                | High               |
| Nicholas(40)                                                               | 1977        | Ghana* (Danfa)                              | General population (rural)       | 13,232 children aged 0-15 years                | Lameness survey (school, village)                               | Yes                 | Clinical investigation                | High               |
| Hardas(41)                                                                 | 1974        | India* (Nagpur)                             | General population (urban/rural) | 36,826 children aged <12 years                 | Lameness survey (house-to-house)                                | Yes                 | Clinical investigation                | Moderate           |
| Low to lower middle income countries – Average prevalence <sup>+</sup> 425 |             |                                             |                                  |                                                |                                                                 |                     |                                       |                    |

| <b>First Author</b>                                         | <b>Year</b> | <b>Country (Region)</b> | <b>Population status</b> | <b>Population base</b> | <b>Study design / Date</b> | <b>Full article</b> | <b>Verification of diagnosis</b> | <b>Risk rating</b> |
|-------------------------------------------------------------|-------------|-------------------------|--------------------------|------------------------|----------------------------|---------------------|----------------------------------|--------------------|
| Upper-middle to high income countries – Average prevalence† |             |                         |                          |                        |                            |                     | 165                              |                    |
| <b>International – Total average prevalence</b>             |             |                         |                          |                        |                            |                     | <b>295</b>                       |                    |

\*Low-to-lower middle income countries.

PPS = Post-polio syndrome.

† Based on 18 studies with low to moderate risk of bias.

‡ Based on 3 studies with low to moderate risk of bias.

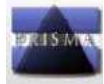

# PRISMA 2009 Checklist

| Section/topic                      | #  | Checklist item                                                                                                                                                                                                                                                                                              | Reported on page # |
|------------------------------------|----|-------------------------------------------------------------------------------------------------------------------------------------------------------------------------------------------------------------------------------------------------------------------------------------------------------------|--------------------|
| <b>TITLE</b>                       |    |                                                                                                                                                                                                                                                                                                             |                    |
| Title                              | 1  | Identify the report as a systematic review, meta-analysis, or both.                                                                                                                                                                                                                                         | 1                  |
| <b>ABSTRACT</b>                    |    |                                                                                                                                                                                                                                                                                                             |                    |
| Structured summary                 | 2  | Provide a structured summary including, as applicable: background; objectives; data sources; study eligibility criteria, participants, and interventions; study appraisal and synthesis methods; results; limitations; conclusions and implications of key findings; systematic review registration number. | 3                  |
| <b>INTRODUCTION</b>                |    |                                                                                                                                                                                                                                                                                                             |                    |
| Rationale                          | 3  | Describe the rationale for the review in the context of what is already known.                                                                                                                                                                                                                              | 4                  |
| Objectives                         | 4  | Provide an explicit statement of questions being addressed with reference to participants, interventions, comparisons, outcomes, and study design (PICOS).                                                                                                                                                  | 4                  |
| <b>METHODS</b>                     |    |                                                                                                                                                                                                                                                                                                             |                    |
| Protocol and registration          | 5  | Indicate if a review protocol exists, if and where it can be accessed (e.g., Web address), and, if available, provide registration information including registration number.                                                                                                                               | n/a                |
| Eligibility criteria               | 6  | Specify study characteristics (e.g., PICOS, length of follow-up) and report characteristics (e.g., years considered, language, publication status) used as criteria for eligibility, giving rationale.                                                                                                      | 5                  |
| Information sources                | 7  | Describe all information sources (e.g., databases with dates of coverage, contact with study authors to identify additional studies) in the search and date last searched.                                                                                                                                  | 5                  |
| Search                             | 8  | Present full electronic search strategy for at least one database, including any limits used, such that it could be repeated.                                                                                                                                                                               | 5                  |
| Study selection                    | 9  | State the process for selecting studies (i.e., screening, eligibility, included in systematic review, and, if applicable, included in the meta-analysis).                                                                                                                                                   | 5                  |
| Data collection process            | 10 | Describe method of data extraction from reports (e.g., piloted forms, independently, in duplicate) and any processes for obtaining and confirming data from investigators.                                                                                                                                  | 6                  |
| Data items                         | 11 | List and define all variables for which data were sought (e.g., PICOS, funding sources) and any assumptions and simplifications made.                                                                                                                                                                       | 6                  |
| Risk of bias in individual studies | 12 | Describe methods used for assessing risk of bias of individual studies (including specification of whether this was done at the study or outcome level), and how this information is to be used in any data synthesis.                                                                                      | 5                  |
| Summary measures                   | 13 | State the principal summary measures (e.g., risk ratio, difference in means).                                                                                                                                                                                                                               | 6                  |
| Synthesis of results               | 14 | Describe the methods of handling data and combining results of studies, if done, including measures of consistency (e.g., $I^2$ ) for each meta-analysis.                                                                                                                                                   | 6                  |

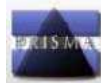

# PRISMA 2009 Checklist

Page 1 of 2

| Section/topic                 | #  | Checklist item                                                                                                                                                                                           | Reported on page # |
|-------------------------------|----|----------------------------------------------------------------------------------------------------------------------------------------------------------------------------------------------------------|--------------------|
| Risk of bias across studies   | 15 | Specify any assessment of risk of bias that may affect the cumulative evidence (e.g., publication bias, selective reporting within studies).                                                             | 6                  |
| Additional analyses           | 16 | Describe methods of additional analyses (e.g., sensitivity or subgroup analyses, meta-regression), if done, indicating which were pre-specified.                                                         | n/a                |
| <b>RESULTS</b>                |    |                                                                                                                                                                                                          |                    |
| Study selection               | 17 | Give numbers of studies screened, assessed for eligibility, and included in the review, with reasons for exclusions at each stage, ideally with a flow diagram.                                          | 7                  |
| Study characteristics         | 18 | For each study, present characteristics for which data were extracted (e.g., study size, PICOS, follow-up period) and provide the citations.                                                             | 7                  |
| Risk of bias within studies   | 19 | Present data on risk of bias of each study and, if available, any outcome level assessment (see item 12).                                                                                                | 8                  |
| Results of individual studies | 20 | For all outcomes considered (benefits or harms), present, for each study: (a) simple summary data for each intervention group (b) effect estimates and confidence intervals, ideally with a forest plot. | n/a                |
| Synthesis of results          | 21 | Present results of each meta-analysis done, including confidence intervals and measures of consistency.                                                                                                  | 8                  |
| Risk of bias across studies   | 22 | Present results of any assessment of risk of bias across studies (see Item 15).                                                                                                                          | 9                  |
| Additional analysis           | 23 | Give results of additional analyses, if done (e.g., sensitivity or subgroup analyses, meta-regression [see Item 16]).                                                                                    | n/a                |
| <b>DISCUSSION</b>             |    |                                                                                                                                                                                                          |                    |
| Summary of evidence           | 24 | Summarize the main findings including the strength of evidence for each main outcome; consider their relevance to key groups (e.g., healthcare providers, users, and policy makers).                     | 9                  |
| Limitations                   | 25 | Discuss limitations at study and outcome level (e.g., risk of bias), and at review-level (e.g., incomplete retrieval of identified research, reporting bias).                                            | 10                 |
| Conclusions                   | 26 | Provide a general interpretation of the results in the context of other evidence, and implications for future research.                                                                                  | 12                 |
| <b>FUNDING</b>                |    |                                                                                                                                                                                                          |                    |
| Funding                       | 27 | Describe sources of funding for the systematic review and other support (e.g., supply of data); role of funders for the systematic review.                                                               | 13                 |

From: Moher D, Liberati A, Tetzlaff J, Altman DG, The PRISMA Group (2009). Preferred Reporting Items for Systematic Reviews and Meta-Analyses: The PRISMA Statement. PLoS Med 6(6): e1000097. doi:10.1371/journal.pmed1000097

For more information, visit: [www.prisma-statement.org](http://www.prisma-statement.org).

Page 2 of 2

For peer review only - <http://bmjopen.bmj.com/site/about/guidelines.xhtml>

# BMJ Open

## A systematic review of the worldwide prevalence of survivors of poliomyelitis reported in 31 studies.

|                                 |                                                                                                                                                                                                                                                                                                                                                                         |
|---------------------------------|-------------------------------------------------------------------------------------------------------------------------------------------------------------------------------------------------------------------------------------------------------------------------------------------------------------------------------------------------------------------------|
| Journal:                        | <i>BMJ Open</i>                                                                                                                                                                                                                                                                                                                                                         |
| Manuscript ID                   | bmjopen-2016-015470.R1                                                                                                                                                                                                                                                                                                                                                  |
| Article Type:                   | Research                                                                                                                                                                                                                                                                                                                                                                |
| Date Submitted by the Author:   | 23-Feb-2017                                                                                                                                                                                                                                                                                                                                                             |
| Complete List of Authors:       | Jones, Kelly; Auckland University of Technology<br>Balalla, Shivanthi; Auckland University of Technology, National Institute for Stroke and Applied Neurosciences<br>Theadom, Alice; Auckland University of Technology, National Institute for Stroke and Applied Neurosciences<br>Jackman, Gordon; Polio NZ Inc.<br>Feigin, Valery; Auckland University of Technology, |
| <b>Primary Subject Heading</b>: | Epidemiology                                                                                                                                                                                                                                                                                                                                                            |
| Secondary Subject Heading:      | Global health                                                                                                                                                                                                                                                                                                                                                           |
| Keywords:                       | EPIDEMIOLOGY, PUBLIC HEALTH, STATISTICS & RESEARCH METHODS                                                                                                                                                                                                                                                                                                              |
|                                 |                                                                                                                                                                                                                                                                                                                                                                         |

SCHOLARONE™  
Manuscripts



1  
2  
3 A systematic review of the worldwide prevalence of survivors of poliomyelitis reported in 31  
4  
5 studies.  
6

7 Kelly Jones, Shivanthi Balalla, Alice Theadom, Gordon Jackman and Valery L. Feigin  
8  
9

10  
11 Kelly Jones, PhD, National Institute for Stroke and Applied Neurosciences, Faculty of Health  
12 and Environmental Studies, Auckland University of Technology, AUT North Shore Campus,  
13  
14 AA254, 90 Akoranga Dr, Northcote 0627, Private Bag 92006, Auckland 1142, New Zealand.  
15

16  
17 Telephone: +64 7 838 4257; Email: [kejones@aut.ac.nz](mailto:kejones@aut.ac.nz).  
18

19  
20 Shivanthi Balalla, MPH (Hons), National Institute for Stroke and Applied Neurosciences,  
21 Faculty of Health and Environmental Studies, Auckland University of Technology, AUT  
22  
23 North Shore Campus, AA254, 90 Akoranga Dr, Northcote 0627, Private Bag 92006,  
24  
25 Auckland 1142, New Zealand. Telephone: +64 9 921 9999; Email: [sbalalla@aut.ac.nz](mailto:sbalalla@aut.ac.nz)  
26  
27

28 Alice Theadom, PhD, National Institute for Stroke and Applied Neurosciences, Faculty of  
29 Health and Environmental Studies, Auckland University of Technology, AUT North Shore  
30  
31 Campus, AA254, 90 Akoranga Dr, Northcote 0627, Private Bag 92006, Auckland 1142, New  
32  
33 Zealand. Telephone: +64 9 921 9166; Email: [atheadom@aut.ac.nz](mailto:atheadom@aut.ac.nz)  
34  
35

36  
37 Gordon Jackman, MA, Polio New Zealand Inc., P.O. Box 791 New Plymouth 4340, New  
38  
39 Zealand. Telephone: +64 7 868 5248; Email: [gjackman@clear.net.nz](mailto:gjackman@clear.net.nz)  
40

41 Valery L Feigin, PhD, National Institute for Stroke and Applied Neurosciences, Faculty of  
42 Health and Environmental Studies, Auckland University of Technology, AUT North Shore  
43  
44 Campus, AA254, 90 Akoranga Dr, Northcote 0627, Private Bag 92006, Auckland 1142, New  
45  
46 Zealand. Telephone: +64 9 921 9166; Email: [vfeigin@aut.ac.nz](mailto:vfeigin@aut.ac.nz)  
47  
48  
49

50  
51  
52 **Address correspondence to:** Dr Kelly Marie Jones, PhD, National Institute for Stroke and  
53 Applied Neurosciences, School of Public Health & Psychosocial Studies, Faculty of Health  
54  
55

1  
2  
3 and Environmental Studies, Auckland University of Technology, AUT North Campus,  
4  
5 AA254, 90 Akoranga Dr, Northcote 0627, Private Bag 92006, Auckland 1142, New Zealand.  
6  
7 Telephone: +64 9 921 9166; Fax: +64 9 921 9620. Email: kejonas@aut.ac.nz  
8

9 **Total word count:** 2,476

10  
11 **Number of tables:** 2

12  
13 **Number of figures:** 3

14  
15 **Number of references:** 48

16  
17 **Number of supplementary files for online only publication:** 2

18  
19 **Key words:** public health; statistics & research methods; epidemiology.  
20  
21  
22  
23  
24  
25  
26  
27  
28  
29  
30  
31  
32  
33  
34  
35  
36  
37  
38  
39  
40  
41  
42  
43  
44  
45  
46  
47  
48  
49  
50  
51  
52  
53  
54  
55  
56  
57  
58  
59  
60

## ABSTRACT

**Background** Accurate prevalence figures estimating the number of survivors of poliomyelitis (disease causing acute flaccid paralysis), following poliovirus infection are not available. We aim to undertake a systematic review of all literature concerning the prevalence of survivors of poliomyelitis.

**Methods** Electronic databases were searched from 1900 up to May 2016 for peer-reviewed studies including population-based approach with a defined denominator and some form of diagnostic or clinical verification of polio. Exclusion criteria were any prevalence data were unable to be extracted or calculated and studies reporting on incidence only. The quality of each included study was assessed using an existing tool modified for use in prevalence studies. Average crude prevalence rates were used to calculate worldwide estimates.

**Results** Thirty-one studies met criteria with 90% of studies conducted in low-to-lower middle-income countries. Significant variability in the prevalence of survivors of poliomyelitis was revealed, in low-to-lower-middle-income (15 per 100,000 in Nigeria to 1,733 in India) and upper-middle to high-income countries (24 (Japan) to 380 per 100,000 (Brazil)). The total combined prevalence of survivors of poliomyelitis for those studies at low to moderate risk of bias ranged from 165 (high-income countries) to 425 (low-to-lower middle-income countries) per 100,000 person years. Historical lameness surveys of children predominated, with wide variation in case definition and assessment criteria, and limited relevance to current prevalence given the lack of incidence of poliovirus infection in the ensuing years.

**Conclusions** These results highlight the need for future epidemiological studies of poliomyelitis to examine nationally representative samples, including all ages and more focus on high-income countries. Such efforts will improve capacity to provide reliable and more robust worldwide prevalence estimates.

### Strengths and limitations of this study

- This is the first and largest international systematic review, including 31 studies, of the prevalence of survivors of poliomyelitis.
- The study found significant variability in the reported prevalence of survivors across low to high-income countries.
- There are a lack of studies examining nationally representative samples.
- There are no accurate current data on the prevalence of survivors of poliomyelitis worldwide.

## INTRODUCTION

Poliovirus (polio) is a highly infectious, incurable viral disease caused by a wild or live vaccine-derived virus that remains endemic in Afghanistan, Pakistan and Nigeria [1]. Since the creation of the Global Polio Eradication Initiative in 1988, alongside mass vaccination programs aimed at eradicating polio, the number of new cases has been cut by 99% [2] from 350,000 cases to 74 reported cases in 2015 [3]. Polio, a human enterovirus [4], primarily affects children aged <5 years with infection most commonly spread by the faecal-oral route. Up to 75% of poliovirus infections in children are asymptomatic, while approximately 24% of cases may experience a low grade fever and sore throat [5]. Less than 1% of cases experience viral replication in the central nervous system causing temporary or permanent acute flaccid paralysis (AFP) (known as poliomyelitis).[6] While there is wide variability regarding the impact of poliovirus infection, estimates suggest that 12-20 million individuals are living with the consequences of the disease worldwide.[7] Up to 40% of all survivors of acute poliomyelitis will experience post-poliomyelitis syndrome (PPS) [8], being the delayed appearance of new or worsening disabling neuromuscular symptoms 30-40 years after the original poliomyelitis attack.[9] However, recent accurate prevalence rates estimating the number of survivors of poliomyelitis are not available.[10]

Published international prevalence studies are problematic. These studies have (i) tended to focus on the initial disease and needs in the immediate aftermath, (ii) been inconsistent in the definition of “polio survivor,” with it often unclear whether this refers all those infected or only those sustaining some form of residual disability, (iii) predominantly focused on health status rather than the everyday effects on people’s lives, their needs, and those of their carers, (iv) produced inconsistent findings on long-term outcomes, perhaps due to cultural differences, and/or have been (vii) limited to lameness surveys of children in mostly low-to-lower middle-income countries.[11] Hence, regional prevalence estimates are often crude and

1  
2  
3 fragmentary. This systematic literature review aims to synthesise current knowledge on the  
4 prevalence of survivors of poliomyelitis worldwide using all available population-based polio  
5 prevalence studies.  
6  
7  
8  
9

## 10 11 **METHODS**

12  
13 This review is reported according to the PRISMA Statement.  
14

### 15 **Search strategy**

16  
17 We searched Medline (1946 to May 2016), CINAHL (1937 to May 2016), Psychology and  
18 Behavioral Sciences Collection (1945 to May 2016), ProQuest (1971 to May 2016), Scopus  
19 (1970 to May 2016), and Web of Science (1900 to May 2016) databases from inception to  
20 May 2016 for relevant studies. A search strategy was developed for Medline using ‘post-  
21 polio syndrome’, ‘poliovirus’, ‘polio’, ‘postpolio’, ‘poliomyelitis’, ‘postpoliomyelitis’,  
22 ‘PPMA’, ‘PPMD’, ‘LEOP’, or ‘late effects of polio’ and ‘epidemiol’, ‘rate’, ‘proportion’, or  
23 ‘prevalence\*’, and was then repeated for other database searches. The complete search  
24 strategy is available online (see supplementary Table S1). Hand searching of included  
25 articles was also undertaken.  
26  
27  
28  
29  
30  
31  
32  
33  
34  
35  
36  
37  
38  
39  
40  
41  
42

43 Selection Criteria.

### 44 **Inclusion/exclusion criteria**

45 Inclusion criteria were: peer reviewed; written in English; reporting of prevalence of  
46 poliomyelitis survivors; use of a population-based, epidemiology approach with a defined  
47 denominator; and some form of diagnostic or clinical verification of polio. Only those studies  
48 reporting on cases ascertained from a general population sample (i.e., not restricted by gender  
49 or ethnicity) were included to enable comparison between populations, and with other  
50  
51  
52  
53  
54  
55  
56  
57  
58  
59  
60

1  
2  
3 conditions, and to enhance representativeness of the findings. Studies in which any prevalence  
4 data were unable to be extracted or calculated, or studies reporting incidence data only were  
5 excluded. Duplicate publications reporting on the same research data were also removed.  
6  
7

### 8 9 **Quality appraisal**

10  
11 Each study was assessed for methodological quality and risk of bias using a 10-item  
12 assessment tool (external (4 items) and internal (6 items) validity) specifically designed for  
13 population-based prevalence studies [12]. Further, a summary assessment evaluates the overall  
14 risk of study bias based on the 10 items [13]. A summary assessment deeming a study to be at  
15 low risk of bias suggests that 'further research is very unlikely to change our confidence in  
16 the estimate'. A moderate risk of bias rating suggests that 'further research is likely to have  
17 an important impact on our confidence in the estimate and may change the estimate'. The  
18 limitations of studies considered to be at high risk of bias suggest that 'further research is  
19 very likely to have an important impact on our confidence in the estimate and is likely to  
20 change the estimate'. For this review, a study was considered to have a high risk of bias if the  
21 target population was not closely representative of the national population, if there was no use  
22 of random selection, and if the study had a more than a minimal risk of non-response bias.  
23  
24  
25  
26  
27  
28  
29  
30  
31  
32  
33  
34  
35  
36

### 37 **Data extraction and synthesis**

38  
39 Two authors (KJ, SB) independently reviewed abstracts for possible inclusion. In cases of  
40 non-consensus, an additional independent review was obtained from a third author (VF). Any  
41 on-going discrepancies were resolved via discussion. In cases of incomprehensive study  
42 methodology, authors were approached to determine a study's potential inclusion. Where  
43 possible, copies of full articles were obtained for studies meeting the inclusion criteria.  
44  
45 Reviewers extracted standard information per study on study characteristics, target  
46 population, research design, and verification of poliovirus infection. Only those studies  
47 considered to be at low to moderate risk of bias were included in the calculation of  
48  
49  
50  
51  
52  
53  
54  
55  
56  
57  
58  
59  
60

1  
2  
3 prevalence estimates. An average prevalence of poliomyelitis is reported for each study as the  
4  
5 number of cases per 100,000 people of all ages or a particular age range, depending on the  
6  
7 data available. Rates were checked for accuracy where possible, depending on the data  
8  
9 provided. Due to a lack of availability of standardized rates, prevalence rates are reported as  
10  
11 crude estimate (i.e. unadjusted rates). Studies reporting adjusted values only have not been  
12  
13 included the average prevalence calculation. In instances where a range of prevalence rates  
14  
15 have been reported in a study and no overall rate reported (e.g. across ethnic groups or  
16  
17 different geographical regions or years), we have used the average of this range for the  
18  
19 purposes of calculating an overall average prevalence. The research protocol was not subject  
20  
21 to ethical approval as no such approval was required according to local regulations.  
22  
23  
24  
25

## 26 **RESULTS**

### 27 **Included studies**

28  
29 Figure 1 presents an overview of the study selection process. The initial search yielded 1,239  
30  
31 citations. Following scanning of the titles for appropriateness for inclusion, those not meeting  
32  
33 criteria and duplicate citations were removed (973). Where available, the abstracts of the  
34  
35 remaining 266 potentially relevant titles identified across all sources (EBSCO n = 25;  
36  
37 ProQuest n = 17; Scopus n = 88; Web of Science n = 136) were obtained. Following the  
38  
39 availability and review of 206 abstracts, 117 full articles were independently evaluated for  
40  
41 inclusion by two reviewers (SB, KJ). This process led to the elimination of 86 studies that did  
42  
43 not meet the required inclusion criteria. The remaining 31 articles met inclusion criteria and  
44  
45 were included in the review.  
46  
47  
48  
49

50 [INSERT FIGURE 1 ABOUT HERE]  
51  
52  
53  
54  
55  
56  
57  
58  
59  
60



1  
2  
3 The 31 eligible population-based studies reported data from 14 different countries.  
4  
5 Data on polio prevalence in low-to-lower middle-income countries were reported in 28 (90%)  
6  
7 studies in 11 countries: India (14 studies); Nigeria (2 studies); Ethiopia (4 studies), and one  
8  
9 study in each of the following locations: Indonesia, Ghana, Bangladesh, Niger, Cameroon,  
10  
11 Sudan, Yemen, and Papua New Guinea. Population-based data on polio prevalence in upper-  
12  
13 middle to high-income countries were available from 3 studies in 3 countries: Japan; Sweden;  
14  
15 and Brazil.  
16  
17  
18  
19

### 20 **Study characteristics**

21  
22  
23 Table 1 provides a summary of the characteristics of those articles included in the review,  
24  
25 including details of polio verification, population status, study design, and risk of bias. The  
26  
27 included studies reported on polio prevalence data collected between 1974 and 2004. In terms  
28  
29 of methodologies implemented across the included studies, poliovirus infection was verified  
30  
31 in 28 (90%) cases via the use of clinical investigations (i.e., examination by a physician or  
32  
33 similar). Two of these studies also used laboratory investigations (i.e., virological  
34  
35 confirmation) to confirm a history of polio. Twenty-nine (94%) of studies presented data  
36  
37 collected by lameness surveys. These included surveys of schools (5), villages (1), families  
38  
39 (1), house-to-house surveys (16), or a mixture there of (4), and postal questionnaires (1). One  
40  
41 lameness survey examined a national population. The remaining two studies (6%) used  
42  
43 multiple sources of case ascertainment. Studies most commonly examined urban/rural or  
44  
45 semi-rural populations (12), with 8 eight studies limited to rural populations. Only one study  
46  
47 reported a specific focus on an urban population. Of the 31 studies included, 26 (84%)  
48  
49 presented data based on children and young persons aged <20 years. In terms of risk of bias,  
50  
51 the majority of studies (77%) were at moderate (14 studies, 45%) to high (10 studies, 32%)  
52  
53 risk of bias (Figure 2). Seven studies (23%) were considered to be at low risk of bias.  
54  
55  
56  
57  
58  
59  
60

[INSERT TABLE 1 ABOUT HERE]

[INSERT FIGURE 2 ABOUT HERE]

### **Poliomyelitis prevalence**

In the general population, crude average prevalence across all included studies ranged from 15 per 100,000 in Nigeria to 1,733 in Ajmer City, India (Figure 3). Among all low-to-lower middle-income countries, crude rates of poliomyelitis prevalence ranged from 15 per 100,000 (Igbo-Ora, Nigeria) to 1,733 per 100,000 (Ajmer City, Rajasthan, India). Among all high-income countries, crude rates of polio prevalence ranged from 24 (PPS) per 100,000 (Japan) to 380 per 100,000 (Brazil). For those studies considered to be at low to moderate risk of bias, prevalence estimates ranged from 92 in Sweden to 730 in Ethiopia. The total combined prevalence of polio for those studies at low to moderate risk of bias ranged from 165 (high-income countries) to 425 (low-to-lower middle-income countries) per 100,000 person years.

[INSERT FIGURE 3 ABOUT HERE]

### **DISCUSSION**

This study reviews all the available data from population-based poliomyelitis prevalence studies. Findings reveal significant discrepancies in average crude unadjusted prevalence rates, both between and within countries. Across all included studies and within low-to-lower middle-income countries, prevalence rates ranged from 15 per 100,000 person-years in Igbo-Ora Nigeria to 1,733 in Ajmer City, India. Within high-income countries, rates ranged from 24 in Japan to 380 in Brazil.

Worldwide variations in prevalence ratings could be attributed to the diversity (and at times a lack of clarity) of applied case definitions and assessment processes to determine a

1  
2  
3 history of poliomyelitis. For example, while the majority of studies used lameness surveys,  
4  
5 some studies were limited to the examination of lower extremity disabilities. Other studies  
6  
7 included the examination of upper extremity disabilities in their efforts to identify those  
8  
9 affected by poliovirus leading to poliomyelitis. Three studies were limited to the examination  
10  
11 of PPS only. Such inconsistencies are of concern given incomplete case ascertainment or  
12  
13 disease misclassification can significantly skew the reported prevalence. Even assuming that  
14  
15 all cases were ascertained in a given study, data would still omit those survivors of  
16  
17 poliomyelitis who are now free from any observable, physical ailments. However, perhaps  
18  
19 more problematic are the risks for over-reporting due to the inclusion of cases of non-polio  
20  
21 AFP.  
22  
23

24  
25         Alongside methodological variations and shortcomings discussed above, rather than  
26  
27 informing estimates of the prevalence of survivors of poliomyelitis worldwide, limitations in  
28  
29 the literature render this review largely of the historical prevalence of residual AFP that may  
30  
31 be due to poliomyelitis. AFP is a clinical syndrome with a broad array of possible etiologies  
32  
33 (i.e., spinal cord compression, trauma, exposure to chemicals, recent illness) that serves as a  
34  
35 proxy for poliomyelitis [14]. Figures from AFP surveillance surveys, an essential strategy of  
36  
37 the Global Polio Eradication Initiative [13], suggest that non-polio AFP affects 1-3 cases per  
38  
39 100,000 children aged <15 years per year [15]. Subsequently lameness surveys, most  
40  
41 common in this review, risk overstating the prevalence of survivors of polio. Such risks are  
42  
43 especially high in areas such as Afghanistan, India and Nigeria who have the highest  
44  
45 annualized non-polio AFP rate compared with the number of poliovirus cases [16].  
46  
47 Furthermore, few studies examined the prevalence of survivors of poliomyelitis across all age  
48  
49 groups, nor have samples that are representative of the respective national population been  
50  
51 studied to inform appropriate gender, age and ethnicity estimates. Findings from lameness  
52  
53  
54  
55  
56  
57  
58  
59  
60

1  
2  
3 surveys in the current review also have considerable variation in the range of age groups  
4 surveyed (i.e., 5-15 years, 0-6 years).  
5  
6

7 Our findings suggest the average crude worldwide prevalence of 295/100,000 person  
8 years. However, many of the studies included in this review were undertaken in geographical  
9 areas where rates of non-polio AFP are high, the dated nature of studies (many being  
10 published more than 30 years ago) and since aging population, and the 99% reduction in the  
11 more recent incidence of poliovirus infection, it must be noted that the actual worldwide  
12 prevalence is likely much lower.  
13  
14  
15  
16  
17  
18  
19

20 This review has provided an overview of studies to date that have endeavored to  
21 examine the prevalence of survivors of poliomyelitis. While all efforts were made to identify  
22 and access all articles relevant to the review, it is important to acknowledge the likelihood  
23 that some studies (i.e., unpublished or inaccessible studies) were not identified by the search  
24 strategy and therefore excluded. Well-designed epidemiological studies are clearly required  
25 to accurately determine the current prevalence of poliomyelitis survivors, living either with or  
26 without AFP.  
27  
28  
29  
30  
31  
32  
33  
34

35 Future epidemiological polio studies can reduce bias noted in this review by including  
36 the use of random or cluster sampling, the examination of populations that are representative  
37 of the national population where possible, and the application of clear case definitions and  
38 diagnosis. In addition to recommending that future studies to adhere to the Strengthening the  
39 Reporting of Observational Studies in Epidemiology (STROBE) Statement [17], we offer  
40 specific recommendations for the pursuit of future studies examining prevalence of survivors  
41 of poliomyelitis in Table 2.  
42  
43  
44  
45  
46  
47  
48  
49

50 [INSERT TABLE 2 ABOUT HERE]  
51  
52  
53  
54  
55  
56  
57  
58  
59  
60

Table 2. Suggested recommendations for future epidemiological studies of poliomyelitis.

---

**External validity**

Examine nationally representative populations to enhance the generalizability of findings

Further prevalence studies are required in high-income countries

Examine all age groups (i.e., adults and children)

Estimate prevalence by age, sex, residency (urban/rural) and ethnic-specific rates

Undertake a census OR use some form of random selection (i.e., cluster sampling)

Extending findings of lameness surveys by also capturing lame-free cases of poliomyelitis (i.e., using multiple sources of case ascertainment including review of medical records)

Use an established risk of bias tool specifically designed for use in population-based studies

---

**Internal validity**

Standard case definition and clinical evaluation

Describe any efforts to address potential sources of bias

Appropriate numerator (s) and denominator (s)

---

**Conclusions**

In conclusion, this review reported prevalence of poliomyelitis survivors worldwide from all identified studies. The majority of research to date has been limited to the examination of children and adolescents in low to lower middle-income countries (predominantly India) who reside in geographical regions that are not representative of the national population (in terms of age, sex, ethnic distributions, for example) and face high rates of non-polio AFP. Further research of the prevalence of survivors of poliomyelitis required using a population-based

1  
2  
3 approach, examining nationally representative samples of all ages, particularly in high  
4  
5 income countries including those declared to be polio-free. Such efforts will reduce risks for  
6  
7 sampling and measurement bias and improve capacity to provide reliable and more robust  
8  
9 worldwide prevalence estimates.  
10

11  
12 **Competing Interests** None declared.  
13

14 **Disclosure of conflict of interest** There are no conflicts of interest.  
15

16 **Funding** This work was funded by The Sir Thomas and Lady Duncan Trust Fund.  
17

### 18 **Legends**

19  
20  
21 Figure 1. Flow diagram of included/excluded studies.  
22

23 Figure 2. Risk of bias summary of included population-based studies in reverse chronological  
24 order.  
25

26  
27 Figure 3. Poliomyelitis prevalence by country income level.  
28  
29  
30

### 31 **Contributorship statement**

32  
33 GJ conceived on the study. SB conducted searches and extracted the data. KJ and SB  
34  
35 compiled and analyzed data. VF, AT and GJ advised throughout the study. KJ prepared the  
36  
37 initial draft of the manuscript. All authors provided conceptual input and critical review of  
38  
39 drafts.  
40  
41  
42

### 43 **Data sharing statement**

44  
45  
46 No additional data available.  
47  
48  
49  
50  
51  
52  
53  
54  
55  
56  
57  
58  
59  
60

Table 1. Details of included population-based studies in reverse chronological order.

| <b>First Author</b> | <b>Year</b> | <b>Country (Region)</b>           | <b>Population status</b>                       | <b>Population base</b>                  | <b>Study design / Date</b>                                                                     | <b>Full article</b> | <b>Verification of diagnosis</b>      | <b>Risk rating</b> |
|---------------------|-------------|-----------------------------------|------------------------------------------------|-----------------------------------------|------------------------------------------------------------------------------------------------|---------------------|---------------------------------------|--------------------|
| Takemura[18]        | 2004        | Japan (Kitakyushu)                | Registry of 13,000 physically disabled persons | 342                                     | Lameness survey (postal questionnaire)                                                         | Yes                 | Clinical investigation                | Moderate           |
| Tessema[19]         | 2001        | Ethiopia* (Gondar Zuria district) | General population (urban/rural)               | 12,000 children aged 1-15 years         | Lameness survey (house-to-house) Jul-Aug 1993                                                  | Yes                 | Clinical investigation                | Low                |
| Anand[20]           | 1998        | India* (Ballabgarh, Haryana)      | General population (rural)                     | 28,464 children aged <15 years          | Lameness survey (house-to-house) Dec 1996                                                      | Yes                 | Clinical and laboratory investigation | High               |
| Srinivasa[21]       | 1997        | India* (Pondicherry)              | General population (urban/rural)               | Approx. 11,000 children aged <60 months | Lameness survey (house-to-house) Jan-Feb of each year between 1989-91                          | Yes                 | Clinical investigation                | Moderate           |
| Ahlstrom[22]        | 1993        | Sweden (Orebro)                   | General population (urban/rural)               | 269,341                                 | Multiple sources (hospital, outpatient, institutional, insurance, medical records) 01 Jan 1988 | Yes                 | Search of clinical records            | Low                |
| Soudarssane[23]     | 1993        | India* (Pondicherry)              | General population                             | 47,960 children aged 0-6 years          | Lameness survey (house-to-house) Apr-Jul 1989                                                  | Yes                 | Clinical investigation                | Low                |
| Kumar[24]           | 1991        | India* (Ambala, Haryana State)    | General population                             | 15,761 children aged <15 years          | Lameness survey (house-to-house) Jan 1989                                                      | Yes                 | Clinical investigation                | High               |
| Balraj[25]          | 1990        | India* (Northern)                 | General population                             | 42,045 children aged <5 years           | Lameness survey (house-to-house)                                                               | Yes                 | Clinical investigation                | Moderate           |

| First Author       | Year | Country (Region)                         | Population status                | Population base                 | Study design / Date                           | Full article | Verification of diagnosis | Risk rating |
|--------------------|------|------------------------------------------|----------------------------------|---------------------------------|-----------------------------------------------|--------------|---------------------------|-------------|
|                    |      | Arcot District, Tamil Nadu State)        | (rural)                          |                                 | Feb-Oct 1988                                  |              |                           |             |
| Mehra[26]          | 1990 | India* (New Delhi)                       | General population (urban/rural) | 7,318 children aged 5-15 years  | Lameness survey (house-to-house) Jun-Aug 1986 | Yes          | Clinical investigation    | Moderate    |
| Parakoyi[27]       | 1990 | Nigeria* (Ilorin, Kwara State)           | General population (urban/rural) | 4,576 children aged 5-9 years   | Lameness survey (house-to-house) March 1988   | Yes          | Clinical investigation    | Low         |
| Tekle-Haimanot[28] | 1990 | Ethiopia* (Meskan & Moreko subdistricts) | General population (rural)       | 60,820 adults                   | Lameness survey (house-to-house) 1986-1988    | Yes          | Clinical investigation    | Moderate    |
| Khajuria[29]       | 1989 | India* (Haryana)                         | General population (rural)       | 37,851 children aged 1-11 years | Lameness survey (village) 1985                | Yes          | Clinical investigation    | High        |
| Dekker[30]         | 1988 | Ethiopia* (Addis Ababa)                  | General population               | 256,092 children aged <20 years | Lameness survey (school) Unknown date         | Yes          | Clinical investigation    | High        |
| Maru[31]           | 1988 | Ethiopia* (Gondar)                       | General population (urban/rural) | 17,941 children aged 5-9 years  | Lameness survey (house-to-house) Feb-Jul 1983 | Yes          | Clinical investigation    | Low         |
| Osuntokun[32]      | 1987 | Nigeria* (Igbo-Ora)                      | General population               | 18,954                          | Lameness survey (house-to-house) Unknown date | Yes          | Clinical investigation    | Moderate    |
| Tidke[33]          | 1986 | India* (Bombay)                          | General population               | 15,165 children aged <6 years   | Lameness survey (house-to-house)              | Yes          | Clinical investigation    | High        |



1  
2  
3  
4  
5  
6  
7  
8  
9  
10  
11  
12  
13  
14  
15  
16  
17  
18  
19  
20  
21  
22  
23  
24  
25  
26  
27  
28  
29  
30  
31  
32  
33  
34  
35  
36  
37  
38  
39  
40  
41  
42  
43  
44  
45  
46  
47

| First Author | Year | Country (Region)                                | Population status                       | Population base                          | Study design / Date                                                                           | Full article | Verification of diagnosis | Risk rating |
|--------------|------|-------------------------------------------------|-----------------------------------------|------------------------------------------|-----------------------------------------------------------------------------------------------|--------------|---------------------------|-------------|
|              |      |                                                 | (slums)                                 |                                          | Unknown date                                                                                  |              |                           |             |
| Broca[34]    | 1985 | India* (Ajmer City, Rajasthan)                  | General population                      | 6,000 children aged 5-15 years           | Lameness survey (house-to-house) Aug 1981-Mar 1982                                            | Yes          | Clinical investigation    | Moderate    |
| Basu[35]     | 1984 | India (National)*                               | General population (urban / rural)      | 715,039 children aged 5-9 years          | Lameness survey (national) 1981-1982                                                          | Yes          | Clinical investigation    | Low         |
| Heymann[36]  | 1983 | Rep. of Cameroon* (Yaounde, Bamenda, Eseka)     | General population (urban/rural)        | 37,130 children aged 5-11 years          | Multiple sources (hospital and clinical registers, house-to-house and school lameness survey) | Yes          | Clinical investigation    | Moderate    |
| Olive[37]    | 1984 | Sudan* (Port Sudan and Juba, Khartoum)          | General population (urban / semi-rural) | 45,499 children aged 5-13 years          | Lameness survey (house-to-house / school) July-Sept 1982                                      | Yes          | Clinical investigation    | Moderate    |
| Srilatha[38] | 1984 | South India* (North Arcot District, Tamil Nadu) | General population (rural)              | 14,643 children aged 5-17 years          | Lameness survey (school) June-Dec 1979                                                        | Yes          | Unknown                   | High        |
| Hajar[39]    | 1983 | Yemen Arab Republic*                            | General population (urban / rural)      | 12,443 children aged 5-13 years          | Lameness survey (school and community) Nov 1980 – Jan 1981                                    | Yes          | Clinical investigation    | Low         |
| Sabin[40]    | 1983 | Brazil (Federal District of Brazil)             | General population                      | 20,807 children aged 6-7 and 10-11 years | Lameness survey (school) 1980                                                                 | Yes          | Clinical investigation    | Moderate    |

| First Author                                                               | Year | Country (Region)                            | Population status                | Population base                                | Study design / Date                                             | Full article | Verification of diagnosis             | Risk rating |
|----------------------------------------------------------------------------|------|---------------------------------------------|----------------------------------|------------------------------------------------|-----------------------------------------------------------------|--------------|---------------------------------------|-------------|
| Hall[41]                                                                   | 1982 | Papua New Guinea* (Gulf Province)           | General population               | 3,368 children (ages unspecified)              | Lameness survey (school) 1979                                   | Yes          | Unknown                               | High        |
| Rotti[42]                                                                  | 1982 | South India* (Pondicherry)                  | General population (urban)       | 6,683 children aged 6-15 years                 | Lameness survey (house-to-house and school) July 1980-Sept 1981 | Yes          | Clinical investigation                | Moderate    |
| Thuriaux[43]                                                               | 1982 | Niger* (Niamey, Kollo, Tillaberry, Gotheye) | General population (rural/urban) | 46,772 children aged 5-14 years                | Lower limb motor disorders survey (school) Feb-May 1981         | Yes          | Clinical investigation                | Moderate    |
| Snyder[44]                                                                 | 1981 | Bangladesh* (Matlab)                        | General population (rural)       | 25,000 children aged 5-14 years                | Lameness survey (house-to-house) May-Jun 1979                   | Yes          | Clinical investigation                | Moderate    |
| Ulfah[45]                                                                  | 1981 | Indonesia* (Yogyakarta)                     | Philanthropic private agency     | 94,376 children and adolescents aged <20 years | Lameness survey (families)                                      | Yes          | Clinical and laboratory investigation | High        |
| Jhala[46]                                                                  | 1979 | India* (Patan Taluka, Gujarat)              | General population (rural)       | 57,435 adults                                  | Lameness survey (house-to-house)                                | Yes          | Clinical investigation                | High        |
| Nicholas[47]                                                               | 1977 | Ghana* (Danfa)                              | General population (rural)       | 13,232 children aged 0-15 years                | Lameness survey (school, village)                               | Yes          | Clinical investigation                | High        |
| Hardas[48]                                                                 | 1974 | India* (Nagpur)                             | General population (urban/rural) | 36,826 children aged <12 years                 | Lameness survey (house-to-house)                                | Yes          | Clinical investigation                | Moderate    |
| Low to lower middle income countries – Average prevalence <sup>+</sup> 425 |      |                                             |                                  |                                                |                                                                 |              |                                       |             |

1  
2  
3  
4  
5  
6  
7  
8  
9  
10  
11  
12  
13  
14  
15  
16  
17  
18  
19  
20  
21  
22  
23  
24  
25  
26  
27  
28  
29  
30  
31  
32  
33  
34  
35  
36  
37  
38  
39  
40  
41  
42  
43  
44  
45  
46  
47

| First Author                                                | Year | Country (Region) | Population status | Population base | Study design / Date | Full article | Verification of diagnosis | Risk rating |
|-------------------------------------------------------------|------|------------------|-------------------|-----------------|---------------------|--------------|---------------------------|-------------|
| Upper-middle to high income countries – Average prevalence† |      |                  |                   |                 |                     |              |                           | 165         |
| <b>International – Total average prevalence</b>             |      |                  |                   |                 |                     |              |                           | <b>295</b>  |

\*Low to lower-middle income countries.  
 PPS = Post-polio syndrome.  
 † Based on 18 studies with low to moderate risk of bias.  
 ‡Based on 3 studies with low to moderate risk of bias.

For peer review only

## References

1. Toole MJ. So close: remaining challenges to eradicating polio. *BMC Med* 2016;**14**(43) doi:  
<http://dx.doi.org/10.1186/s12916-016-0594-6>.
2. Global Polio Eradication Initiative. Global polio eradication initiative annual report 2007:  
Impact of the intensified eradication effort. Switzerland: World Health Organisation,  
2008.
3. World Health Organisation. Poliomyelitis Fact Sheet Updated April 2016, 2016.
4. Dowdle WR, Birmingham ME. The biologic principles of poliovirus eradication. *The  
Journal of Infectious Diseases* 1997;**175**((Suppl 1)):S286-92
5. Centers for Disease Control and Prevention. Poliomyelitis In: .J H, Kroger A, Wolfe C,  
eds. Epidemiology and Prevention of Vaccine-Preventable Diseases (The Pink Book).  
13 ed. Washington DC: Public Health Foundation, 2015.
6. Shibuya K, Murray CJL. Poliomyelitis. In: C.L. M, Lopez AD, Mathers C, et al., eds. The  
global epidemiology of infectious diseases. Geneva: World Health Organisation,  
2004:111-49.
7. Petrie KJ, Weinman J. Why illness perceptions matter. *Clin Med* 2006;**6**(6):536-39
8. Lin KH, Lim YW. Post-poliomyelitis syndrome: case report and review of the literature.  
*Annals-academy of Medicine Singapore* 2005;**34**(7):447
9. Matz K, Teuschl Y, Firlinger B, et al. Multidomain lifestyle interventions for the  
prevention of cognitive decline after ischemic stroke: Randomized trial. *Stroke*  
2015;**46**(10):2874-80 doi: 10.1161/STROKEAHA.115.009992.
10. Mulhern S, McMillan TM. Knowledge and expectation of post-concussion symptoms in  
the general population. *Journal of Psychosomatic Research* 2006;**61**:439-45

- 1  
2  
3 11. Burholt V, Nash P. Short Form 36 (SF-36) Health Survey Questionnaire: normative data  
4 for Wales. *J Public Health Dent* 2011;**33**(4):587-603 doi:  
5 <http://dx.doi.org/1093/pubmed/fdr006>.  
6  
7  
8  
9 12. Hoy D, Brooks P, Woolf A, et al. Assessing risk of bias in prevalence studies:  
10 Modification of an existing tool and evidence of interrater agreement. *J Clin*  
11 *Epidemiol* 2012;**65**:934-39  
12  
13  
14  
15 13. Nathanson N, Kew OM. From emergence to eradication: The epidemiology of  
16 poliomyelitis deconstructed. *American Journal of Epidemiology* 2010;**172**(11):1213-  
17 29 doi: 10.1093/aje/kwq320.  
18  
19  
20  
21  
22 14. Growdon JH, Fink JS. Paralysis and movement disorder. In: Isselbacher KJ, Braunwald  
23 E, Wilson JD, eds. *Harrison's principles of internal medicine*. New York: McGraw-  
24 Hill Book Company, 1994:115-25.  
25  
26  
27  
28 15. Snider CJ, Diop OM, Burns CC, et al. Surveillance Systems to Track Progress Toward  
29 Polio Eradication — Worldwide, 2014–2015. *MMWR Morb Mortal Wkly Rep*,  
30 2016:346-51.  
31  
32  
33  
34  
35 16. Mateen FJ, Black RE. Expansion of acute flaccid paralysis surveillance: beyond  
36 poliomyelitis. *Trop Med Int Health* 2013;**18**(11):1421-22 doi:  
37 <http://dx.doi.org/10.1111/tmi.12181>.  
38  
39  
40  
41 17. von Elm E, Altman DG, Egger M, et al. The Strengthening the Reporting of  
42 Observational Studies in Epidemiology (STROBE) Statement: Guidelines for  
43 Reporting Observational Studies. *Ann Intern Med* 2007;**147**(8):573-77 doi:  
44 <http://dx.doi.org/10.7326/0003-4819-147-8-200710160-00010-w1>.  
45  
46  
47  
48  
49 18. Takemura J, Saeki S, Hachisuka K, et al. Prevalence of post-polio syndrome based on a  
50 cross-sectional survey in Kitakyushu, Japan. *J Rehabil Med* 2004;**36**(1):1-3  
51  
52  
53  
54  
55  
56  
57  
58  
59  
60

- 1  
2  
3 19. Tessema T, Hailu A. Epidemiology of poliomyelitis in northwestern Ethiopia. *East Afr*  
4  
5 *Med J* 2001;**78**(8):430-2  
6  
7 20. Anand K, Kant S, Kumar G, et al. Thirty year trend (1967-1996) in prevalence of  
8  
9 poliomyelitis and vaccine coverage in Ballabgarh, Haryana, India. *J Epidemiol*  
10  
11 *Community Health* 1998;**52**(12):823-25  
12  
13 21. Srinivasa DK, Sahai A, Rotti SB, et al. Poliomyelitis trends in Pondicherry, South India,  
14  
15 1989-91. *J Epidemiol Community Health* 1997;**51**(4):443-8  
16  
17 22. Ahlström G, Gunnarsson LG, Leissner P, et al. Epidemiology of Neuromuscular  
18  
19 Diseases, Including the Postpolio Sequelae, in a Swedish County. *Neuroepidemiology*  
20  
21 1993;**12**(5):262-69  
22  
23 23. Soudarssanane MB, Rotti SB, Srinivasa DK, et al. Paralytic poliomyelitis in children  
24  
25 under 6 years in Pondicherry: a community survey. *J Epidemiol Community Health*  
26  
27 1993;**47**(3):210-14 doi: 10.1136/jech.47.3.210.  
28  
29 24. Kumar R, Kumar V. Poliomyelitis control by annual immunization campaigns with oral  
30  
31 polio-virus vaccine in a rural area of India. *Trop Geogr Med* 1991;**43**(1-2):215-9  
32  
33 25. Balraj V, John JT, Thomas M, et al. Efficacy of Oral Poliovirus Vaccine in Rural  
34  
35 Communities of North Arcot District, India. *Int J Epidemiol* 1990;**19**(3):711-14 doi:  
36  
37 10.1093/ije/19.3.711.  
38  
39 26. Mehra M, Bansal Y. Prevalence of paralytic poliomyelitis in a rural and urban community  
40  
41 of Delhi. *Indian Pediatr* 1990;**27**(9):915-7  
42  
43 27. Parakoyi B, Babaniyi OA. Prevalence of paralytic poliomyelitis in children of Kwara  
44  
45 State, Nigeria: report of a house-to-house survey. *East Afr Med J* 1990;**67**(8):545-9  
46  
47 28. Tekle-Haimanot R, Abebe M, Gebre-Mariam A, et al. Community-based study of  
48  
49 neurological disorders in rural central Ethiopia. *Neuroepidemiology* 1990;**9**(5):263-77  
50  
51  
52  
53  
54  
55  
56  
57  
58  
59  
60

- 1  
2  
3 29. Khajuria R, Datta N, Kumar R, et al. Impact of annual immunisation programme with  
4 oral polio vaccine on the prevalence of paralytic poliomyelitis. *The Indian Journal of*  
5 *Pediatrics* 1989;**56**(3):343-7  
6  
7  
8  
9 30. Dekker PA, Green-Abate C. Prevalence of residual paralysis due to poliomyelitis in  
10 schoolchildren in Addis Ababa. *Ethiop Med J* 1988;**26**(3):133-8  
11  
12  
13 31. Maru M, Getahun A, Hoshna S. Prevalence of paralytic poliomyelitis in rural and urban  
14 populations in Ethiopia: report of a house-to-house survey. *Am J Trop Med Hyg*  
15 1988;**38**(3):633-5  
16  
17  
18  
19 32. Osuntokun BO, Adeuja AOG, Schoenberg BS, et al. Neurological disorders in Nigerian  
20 Africans: A community-based study. *Acta Neurol (Napoli)* 1987;**75**(1):13-21  
21  
22  
23 33. Tidke RW, Joshi U, Patel RB. Paralytic poliomyelitis in slums of Bombay. *The Indian*  
24 *Journal of Pediatrics* 1986;**53**(1):109-13 doi: 10.1007/bf02787081.  
25  
26  
27  
28 34. Broca JS, Chaturvedi SK, Mathur GM. Prevalence of residual polio paralysis in children  
29 of 5-15 years age group in Ajmer City. *Indian J Public Health* 1985;**29**(3):193-200  
30  
31  
32 35. Basu Rf, Sokhey J. Prevalence of poliomyelitis in India. *The Indian Journal of Pediatrics*  
33 1984;**51**(5):515-19 doi: 10.1007/bf02776613.  
34  
35  
36  
37 36. Heymann DL, Floyd VD, Lichnevski M, et al. Estimation of incidence of poliomyelitis  
38 by three survey methods in different regions of the United Republic of Cameroon.  
39  
40  
41 *Bull World Health Organ* 1983;**61**(3):501-07  
42  
43  
44 37. Olive JM, Gadir A, Abbas M. Prevalence of residual paralysis from paralytic  
45 poliomyelitis in some urban and semi-rural areas of the Sudan, November 1982. *J*  
46 *Trop Pediatr* 1984;**30**(6):329-33  
47  
48  
49 38. Srilatha V, Mukarji D, John TJ. The Prevalence of Poliomyelitis in Rural School Children  
50 in South India. *J Trop Pediatr* 1984;**30**(2):68-69 doi: 10.1093/tropej/30.2.68.  
51  
52  
53  
54  
55  
56  
57  
58  
59  
60

- 1  
2  
3 39. Hajar M, Zeid A, Saif M, et al. Prevalence, incidence, and epidemiological features of  
4  
5 poliomyelitis in the Yemen Arab Republic. *Bull World Health Organ* 1983;**61**(2):353  
6  
7 40. Sabin AB, Silva E. Residual paralytic poliomyelitis in a tropical region of Brazil, 1969–  
8  
9 1977: prevalence surveys in different age groups as indicators of changing incidence.  
10  
11 *Am J Epidemiol* 1983;**117**(2):193-200  
12  
13 41. Hall AJ. A survey of lameness in school children in Gulf Province. *P N G Med J*  
14  
15 1982;**25**(1):26-8.  
16  
17 42. Rotti SB, Satpathy SK, Mehta SP. Prevalence of paralytic poliomyelitis in Pondicherry,  
18  
19 South India. *J Epidemiol Community Health* 1982;**36**(4):279-81 doi:  
20  
21 10.1136/jech.36.4.279.  
22  
23 43. Thuriaux MC. A prevalence survey of lower limb motor disorders in school-age children  
24  
25 in Niger and an estimation of poliomyelitis incidence. *Trop Geogr Med*  
26  
27 1982;**34**(2):163-8  
28  
29 44. Snyder JD, Black RE, Baqui AH, et al. Prevalence of residual paralysis from paralytic  
30  
31 poliomyelitis in a rural population of Bangladesh. *Am J Trop Med Hyg*  
32  
33 1981;**30**(2):426-30  
34  
35 45. Ulfah NM, Parastho S, Sadjimin T, et al. Polio and Lameness in Yogyakarta, Indonesia.  
36  
37 *Int J Epidemiol* 1981;**10**(2):171-75 doi: 10.1093/ije/10.2.171.  
38  
39 46. Jhala CI, Goel RK, Dave SK. Epidemiology of poliomyelitis in rural area of Gujarat -- a  
40  
41 report of house to house survey in Patan Taluka. *Indian J Med Sci* 1979;**33**(6):143-9  
42  
43 47. Nicholas DD, Kratzer JH, Ofosu-Amaah S, et al. Outside Europe. Is poliomyelitis a  
44  
45 serious problem in developing countries?--the Danfa experience. *BMJ*  
46  
47 1977;**1**(6067):1009-12 doi: 10.1136/bmj.1.6067.1009.  
48  
49 48. Hardas U, Waikar A. Pilot survey of disabled children in and around Nagpur. *The Indian*  
50  
51 *Journal of Pediatrics* 1974;**41**(8):267-71 doi: 10.1007/bf02829306.  
52  
53  
54  
55  
56  
57  
58  
59  
60



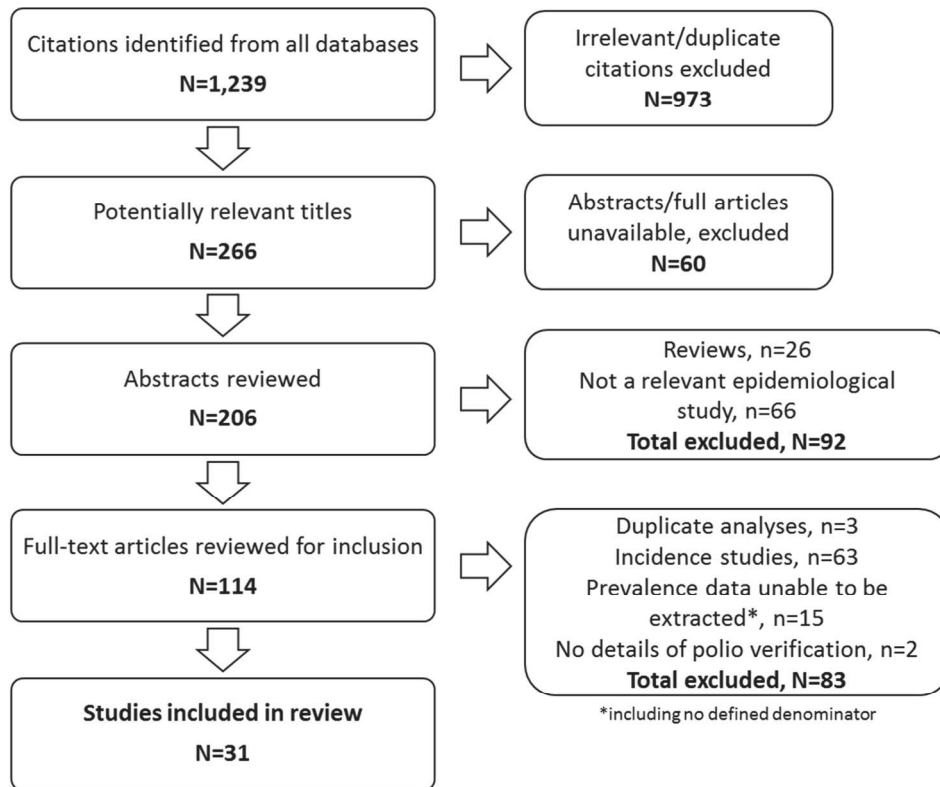

Figure 1. Flow diagram of included/excluded studies.

183x161mm (300 x 300 DPI)

|                     | Target population close representation of national | Sampling frame true representation of target population | Random selection used | Minimal risk of non-response bias | Data collected from subjects (not a proxy) | Acceptable case definition | Reliable and validity measurement of parameter of | Consistent mode of data collection | Appropriate prevalence period | Appropriate numerators and denominators | Overall risk |
|---------------------|----------------------------------------------------|---------------------------------------------------------|-----------------------|-----------------------------------|--------------------------------------------|----------------------------|---------------------------------------------------|------------------------------------|-------------------------------|-----------------------------------------|--------------|
| Takemura 2004       | X                                                  | ✓                                                       | ✓                     | X                                 | ✓                                          | ✓                          | X                                                 | ✓                                  | ✓                             | ✓                                       | Moderate     |
| Tessema 2001        | X                                                  | ✓                                                       | ✓                     | X                                 | ✓                                          | ✓                          | ✓                                                 | ✓                                  | ✓                             | ✓                                       | Low          |
| Anand 1998          | X                                                  | X                                                       | X                     | X                                 | ✓                                          | ✓                          | ✓                                                 | ✓                                  | ✓                             | ✓                                       | High         |
| Srinivasa 1997      | X                                                  | ✓                                                       | X                     | X                                 | ✓                                          | ✓                          | ✓                                                 | ✓                                  | ✓                             | ✓                                       | Moderate     |
| Ahlstrom 1993       | ✓                                                  | ✓                                                       | ✓                     | X                                 | X                                          | ✓                          | ✓                                                 | ✓                                  | ✓                             | ✓                                       | Low          |
| Soudarssane 1993    | X                                                  | ✓                                                       | ✓                     | X                                 | ✓                                          | ✓                          | ✓                                                 | ✓                                  | ✓                             | ✓                                       | Low          |
| Kumar 1991          | X                                                  | X                                                       | X                     | X                                 | X                                          | X                          | ✓                                                 | ✓                                  | ✓                             | ✓                                       | High         |
| Balraj 1990         | X                                                  | ✓                                                       | ✓                     | X                                 | ✓                                          | ✓                          | X                                                 | ✓                                  | ✓                             | ✓                                       | Moderate     |
| Mehra 1990          | X                                                  | ✓                                                       | X                     | X                                 | ✓                                          | ✓                          | ✓                                                 | ✓                                  | ✓                             | ✓                                       | Moderate     |
| Parakoyi 1990       | X                                                  | ✓                                                       | ✓                     | X                                 | ✓                                          | ✓                          | ✓                                                 | ✓                                  | ✓                             | ✓                                       | Low          |
| Tekle-Haimanot 1990 | X                                                  | ✓                                                       | ✓                     | ✓                                 | ✓                                          | X                          | X                                                 | ✓                                  | ✓                             | ✓                                       | Moderate     |
| Khajuria 1989       | X                                                  | X                                                       | X                     | X                                 | X                                          | ✓                          | X                                                 | X                                  | ✓                             | ✓                                       | High         |
| Maru 1988           | X                                                  | ✓                                                       | ✓                     | X                                 | ✓                                          | ✓                          | ✓                                                 | ✓                                  | ✓                             | ✓                                       | Low          |
| Osuntokun 1987      | X                                                  | ✓                                                       | ✓                     | X                                 | ✓                                          | X                          | X                                                 | ✓                                  | ✓                             | ✓                                       | Moderate     |
| Tidke 1986          | X                                                  | X                                                       | X                     | X                                 | ✓                                          | ✓                          | ✓                                                 | ✓                                  | ✓                             | ✓                                       | High         |
| Broca 1985          | X                                                  | ✓                                                       | ✓                     | X                                 | ✓                                          | ✓                          | X                                                 | ✓                                  | ✓                             | ✓                                       | Moderate     |
| Basu 1984           | ✓                                                  | ✓                                                       | ✓                     | X                                 | ✓                                          | X                          | ✓                                                 | ✓                                  | ✓                             | ✓                                       | Low          |
| Olive 1984          | X                                                  | ✓                                                       | ✓                     | X                                 | ✓                                          | X                          | ✓                                                 | ✓                                  | ✓                             | ✓                                       | Moderate     |
| Srilatha 1984       | X                                                  | ✓                                                       | X                     | X                                 | ✓                                          | X                          | ✓                                                 | ✓                                  | ✓                             | ✓                                       | High         |
| Hajar 1983          | ✓                                                  | ✓                                                       | ✓                     | X                                 | ✓                                          | ✓                          | ✓                                                 | ✓                                  | ✓                             | ✓                                       | Low          |
| Heymann 1983        | X                                                  | ✓                                                       | ✓                     | X                                 | ✓                                          | ✓                          | ✓                                                 | X                                  | ✓                             | ✓                                       | Moderate     |
| Sabin 1983          | X                                                  | ✓                                                       | X                     | X                                 | ✓                                          | ✓                          | ✓                                                 | ✓                                  | ✓                             | ✓                                       | Moderate     |
| Dekker 1982         | X                                                  | X                                                       | X                     | X                                 | ✓                                          | X                          | X                                                 | ✓                                  | ✓                             | ✓                                       | High         |
| Hall 1982           | X                                                  | ✓                                                       | X                     | X                                 | X                                          | ✓                          | X                                                 | X                                  | ✓                             | ✓                                       | High         |
| Rotti 1982          | X                                                  | ✓                                                       | X                     | X                                 | ✓                                          | ✓                          | ✓                                                 | ✓                                  | ✓                             | ✓                                       | Moderate     |
| Thuriaux 1982       | X                                                  | ✓                                                       | ✓                     | X                                 | ✓                                          | ✓                          | X                                                 | ✓                                  | ✓                             | ✓                                       | Moderate     |
| Snyder 1981         | X                                                  | ✓                                                       | X                     | X                                 | ✓                                          | ✓                          | ✓                                                 | ✓                                  | ✓                             | ✓                                       | Moderate     |
| Ulfah 1981          | X                                                  | X                                                       | X                     | X                                 | ✓                                          | ✓                          | ✓                                                 | X                                  | ✓                             | ✓                                       | High         |
| Nicholas 1977       | X                                                  | X                                                       | X                     | X                                 | X                                          | ✓                          | ✓                                                 | X                                  | ✓                             | ✓                                       | High         |
| Hardas 1974         | X                                                  | ✓                                                       | ✓                     | X                                 | ✓                                          | X                          | ✓                                                 | ✓                                  | ✓                             | ✓                                       | Moderate     |
| Jhala 1973          | X                                                  | X                                                       | X                     | X                                 | ✓                                          | ✓                          | ✓                                                 | ✓                                  | ✓                             | ✓                                       | High         |

Figure 2. Risk of bias summary of included population-based studies in reverse chronological order.

168x233mm (300 x 300 DPI)

1  
2  
3  
4  
5  
6  
7  
8  
9  
10  
11  
12  
13  
14  
15  
16  
17  
18  
19  
20  
21  
22  
23  
24  
25  
26  
27  
28  
29  
30  
31  
32  
33  
34  
35  
36  
37  
38  
39  
40  
41  
42  
43  
44  
45  
46  
47  
48  
49  
50  
51  
52  
53  
54  
55  
56  
57  
58  
59  
60

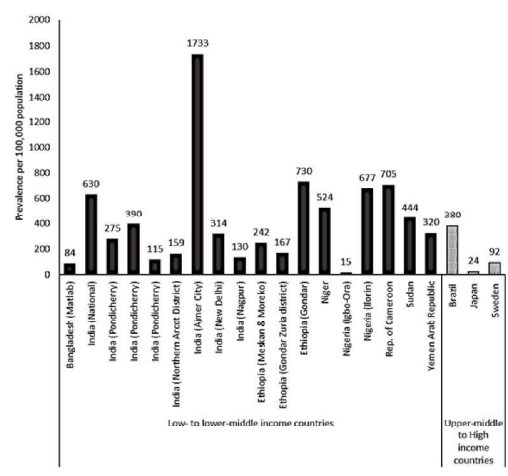

Figure 3. Poliomyelitis prevalence by country income level.

491x359mm (300 x 300 DPI)

View Only

Supplementary Table 1. Full search criteria for studies assessing prevalence of survivors of polio.

| Database (number of hits)                                          | Search Terms                                       |
|--------------------------------------------------------------------|----------------------------------------------------|
|                                                                    | 1.post-polio syndrome                              |
|                                                                    | 2.poliovirus                                       |
|                                                                    | 3.polio                                            |
|                                                                    | 4.postpolio                                        |
| PROQUEST (17)                                                      | 5.poliomyelitis                                    |
| SCOPUS (88)                                                        | 6.postpoliomyelitis                                |
| WEB OF SCIENCE (136)                                               | 7.PPMA                                             |
| EBSCO (Medline, CINAHL, and Psychology & Behavioral Sciences) (25) | 8.PPMD                                             |
| PROQUEST (17)                                                      | 9.LEOP                                             |
|                                                                    | 10.late effects of polio                           |
|                                                                    | 11.1 or 2 or 3 or 4 or 5 or 6 or 7 or 8 or 9 or 10 |
|                                                                    | 12.epidemol                                        |
|                                                                    | 13.rate                                            |
|                                                                    | 14.proportion                                      |
|                                                                    | 15.prevalence*                                     |
|                                                                    | 16.11 and 12 or 13 or 14 or 15                     |

The original search date across all databases was 15<sup>th</sup> of May 2016.

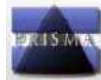

# PRISMA 2009 Checklist

| Section/topic                      | #  | Checklist item                                                                                                                                                                                                                                                                                              | Reported on page # |
|------------------------------------|----|-------------------------------------------------------------------------------------------------------------------------------------------------------------------------------------------------------------------------------------------------------------------------------------------------------------|--------------------|
| <b>TITLE</b>                       |    |                                                                                                                                                                                                                                                                                                             |                    |
| Title                              | 1  | Identify the report as a systematic review, meta-analysis, or both.                                                                                                                                                                                                                                         | 1                  |
| <b>ABSTRACT</b>                    |    |                                                                                                                                                                                                                                                                                                             |                    |
| Structured summary                 | 2  | Provide a structured summary including, as applicable: background; objectives; data sources; study eligibility criteria, participants, and interventions; study appraisal and synthesis methods; results; limitations; conclusions and implications of key findings; systematic review registration number. | 3                  |
| <b>INTRODUCTION</b>                |    |                                                                                                                                                                                                                                                                                                             |                    |
| Rationale                          | 3  | Describe the rationale for the review in the context of what is already known.                                                                                                                                                                                                                              | 4                  |
| Objectives                         | 4  | Provide an explicit statement of questions being addressed with reference to participants, interventions, comparisons, outcomes, and study design (PICOS).                                                                                                                                                  | 4                  |
| <b>METHODS</b>                     |    |                                                                                                                                                                                                                                                                                                             |                    |
| Protocol and registration          | 5  | Indicate if a review protocol exists, if and where it can be accessed (e.g., Web address), and, if available, provide registration information including registration number.                                                                                                                               | n/a                |
| Eligibility criteria               | 6  | Specify study characteristics (e.g., PICOS, length of follow-up) and report characteristics (e.g., years considered, language, publication status) used as criteria for eligibility, giving rationale.                                                                                                      | 5                  |
| Information sources                | 7  | Describe all information sources (e.g., databases with dates of coverage, contact with study authors to identify additional studies) in the search and date last searched.                                                                                                                                  | 5                  |
| Search                             | 8  | Present full electronic search strategy for at least one database, including any limits used, such that it could be repeated.                                                                                                                                                                               | 5                  |
| Study selection                    | 9  | State the process for selecting studies (i.e., screening, eligibility, included in systematic review, and, if applicable, included in the meta-analysis).                                                                                                                                                   | 5                  |
| Data collection process            | 10 | Describe method of data extraction from reports (e.g., piloted forms, independently, in duplicate) and any processes for obtaining and confirming data from investigators.                                                                                                                                  | 6                  |
| Data items                         | 11 | List and define all variables for which data were sought (e.g., PICOS, funding sources) and any assumptions and simplifications made.                                                                                                                                                                       | 6                  |
| Risk of bias in individual studies | 12 | Describe methods used for assessing risk of bias of individual studies (including specification of whether this was done at the study or outcome level), and how this information is to be used in any data synthesis.                                                                                      | 5                  |
| Summary measures                   | 13 | State the principal summary measures (e.g., risk ratio, difference in means).                                                                                                                                                                                                                               | 6                  |
| Synthesis of results               | 14 | Describe the methods of handling data and combining results of studies, if done, including measures of consistency (e.g., $I^2$ ) for each meta-analysis.                                                                                                                                                   | 6                  |

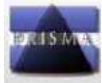

# PRISMA 2009 Checklist

Page 1 of 2

| Section/topic                 | #  | Checklist item                                                                                                                                                                                           | Reported on page # |
|-------------------------------|----|----------------------------------------------------------------------------------------------------------------------------------------------------------------------------------------------------------|--------------------|
| Risk of bias across studies   | 15 | Specify any assessment of risk of bias that may affect the cumulative evidence (e.g., publication bias, selective reporting within studies).                                                             | 6                  |
| Additional analyses           | 16 | Describe methods of additional analyses (e.g., sensitivity or subgroup analyses, meta-regression), if done, indicating which were pre-specified.                                                         | n/a                |
| <b>RESULTS</b>                |    |                                                                                                                                                                                                          |                    |
| Study selection               | 17 | Give numbers of studies screened, assessed for eligibility, and included in the review, with reasons for exclusions at each stage, ideally with a flow diagram.                                          | 7                  |
| Study characteristics         | 18 | For each study, present characteristics for which data were extracted (e.g., study size, PICOS, follow-up period) and provide the citations.                                                             | 7                  |
| Risk of bias within studies   | 19 | Present data on risk of bias of each study and, if available, any outcome level assessment (see item 12).                                                                                                | 8                  |
| Results of individual studies | 20 | For all outcomes considered (benefits or harms), present, for each study: (a) simple summary data for each intervention group (b) effect estimates and confidence intervals, ideally with a forest plot. | n/a                |
| Synthesis of results          | 21 | Present results of each meta-analysis done, including confidence intervals and measures of consistency.                                                                                                  | 8                  |
| Risk of bias across studies   | 22 | Present results of any assessment of risk of bias across studies (see Item 15).                                                                                                                          | 9                  |
| Additional analysis           | 23 | Give results of additional analyses, if done (e.g., sensitivity or subgroup analyses, meta-regression [see Item 16]).                                                                                    | n/a                |
| <b>DISCUSSION</b>             |    |                                                                                                                                                                                                          |                    |
| Summary of evidence           | 24 | Summarize the main findings including the strength of evidence for each main outcome; consider their relevance to key groups (e.g., healthcare providers, users, and policy makers).                     | 9                  |
| Limitations                   | 25 | Discuss limitations at study and outcome level (e.g., risk of bias), and at review-level (e.g., incomplete retrieval of identified research, reporting bias).                                            | 10                 |
| Conclusions                   | 26 | Provide a general interpretation of the results in the context of other evidence, and implications for future research.                                                                                  | 12                 |
| <b>FUNDING</b>                |    |                                                                                                                                                                                                          |                    |
| Funding                       | 27 | Describe sources of funding for the systematic review and other support (e.g., supply of data); role of funders for the systematic review.                                                               | 13                 |

From: Moher D, Liberati A, Tetzlaff J, Altman DG, The PRISMA Group (2009). Preferred Reporting Items for Systematic Reviews and Meta-Analyses: The PRISMA Statement. PLoS Med 6(6): e1000097. doi:10.1371/journal.pmed1000097

For more information, visit: [www.prisma-statement.org](http://www.prisma-statement.org).

Page 2 of 2

For peer review only - <http://bmjopen.bmj.com/site/about/guidelines.xhtml>
