# Supplementary material for: A systematic review of the worldwide prevalence of survivors of poliomyelitis reported in 31 studies
Source: PubMed Central journal article supplement — BMJ Open. 2017 Jul 9;7(7):e015470. doi: 10.1136/bmjopen-2016-015470 (PMC5734404; doi:10.1136/bmjopen-2016-015470), 2017-07-09
Supplement: bmjopen-2016-015470supp001.pdf [file bmjopen-2016-015470supp001.pdf]

Supplementary Table 1. Full search criteria for studies assessing prevalence of survivors of polio.

| Database (number of hits)                                          | Search Terms                                       |
|--------------------------------------------------------------------|----------------------------------------------------|
|                                                                    | 1.post-polio syndrome                              |
|                                                                    | 2.poliovirus                                       |
|                                                                    | 3.polio                                            |
|                                                                    | 4.postpolio                                        |
| PROQUEST (17)                                                      | 5.poliomyelitis                                    |
| SCOPUS (88)                                                        | 6.postpoliomyelitis                                |
| WEB OF SCIENCE (136)                                               | 7.PPMA                                             |
| EBSCO (Medline, CINAHL, and Psychology & Behavioral Sciences) (25) | 8.PPMD                                             |
| PROQUEST (17)                                                      | 9.LEOP                                             |
|                                                                    | 10.late effects of polio                           |
|                                                                    | 11.1 or 2 or 3 or 4 or 5 or 6 or 7 or 8 or 9 or 10 |
|                                                                    | 12.epidemol                                        |
|                                                                    | 13.rate                                            |
|                                                                    | 14.proportion                                      |
|                                                                    | 15.prevalence*                                     |
|                                                                    | 16.11 and 12 or 13 or 14 or 15                     |

The original search date across all databases was 15<sup>th</sup> of May 2016.
